# Supplementary material for: Epigenetic Activation of Plasmacytoid DCs Drives IFNAR-Dependent Therapeutic Differentiation of AML
Source: Oxford University Press journal article supplement (doi:10.1158/2159-8290.cd-20-1145), 2022-03-21
Supplement: cd-20-1145_table_s3_suppst3.xlsx [file cd-20-1145_table_s3_suppst3.xlsx]

## Sheet: Sheet1
#	Condition	Cell number
HTO_1	AML-Vehicle1	3508
HTO_2	AML-Vehicle2	2970
HTO_3	AML-Pano1	3321
HTO_4	AML-Pano2	2083
HTO_5	WT-Vehicle	6673
HTO_6	WT-Pano	3267
