# Supplementary material for: Epigenetic Activation of Plasmacytoid DCs Drives IFNAR-Dependent Therapeutic Differentiation of AML
Source: Oxford University Press journal article supplement (doi:10.1158/2159-8290.cd-20-1145), 2022-03-21
Supplement: cd-20-1145_table_s5_suppst5.xlsx [file cd-20-1145_table_s5_suppst5.xlsx]

## Sheet: LBHeffectinpDC
	logFC	AveExpr	t	P.Value	adj.P.Val	B
0610009B22Rik	0.532237	4.84407	1.66716	0.146154	0.363874	-5.43569
0610009E02Rik	-0.477876	-1.8294	-0.659081	0.534126	0.73945	-5.36206
0610009L18Rik	-0.0695014	0.492259	-0.076865	0.941212	0.977439	-5.60766
0610010F05Rik	0.829327	3.62356	2.99076	0.0240725	0.143224	-3.31107
0610010K14Rik	-0.153818	5.64816	-0.69115	0.515119	0.723939	-6.53824
0610012G03Rik	0.531246	5.16573	1.81378	0.119273	0.326201	-5.22718
0610030E20Rik	0.0642425	5.55305	0.213034	0.838302	0.927453	-6.7777
0610040J01Rik	-0.434739	0.221352	-0.217522	0.834957	0.925367	-5.14655
0610043K17Rik	0.482692	-1.33327	0.828687	0.438765	0.663359	-5.26504
1110004F10Rik	0.298069	7.66543	1.8113	0.119685	0.326731	-5.40628
1110006O24Rik	0.241146	0.469642	0.577296	0.584581	0.775546	-5.75317
1110008P14Rik	-0.138725	4.40267	-0.576137	0.585316	0.776272	-6.54752
1110012L19Rik	0.535061	4.3676	2.08694	0.0815909	0.262951	-4.853
1110020A21Rik	-0.250595	-0.4643	-0.498612	0.635671	0.81139	-5.60411
1110032A03Rik	0.252274	4.26999	0.846292	0.429608	0.655888	-6.41125
1110032F04Rik	1.18937	-1.73628	0.959549	0.374068	0.610873	-4.79628
1110038B12Rik	-0.707551	1.29305	-1.64859	0.149951	0.368568	-4.68599
1110038F14Rik	0.108889	4.89148	0.583912	0.580396	0.773001	-6.53867
1110051M20Rik	0.100599	3.61493	0.514095	0.625429	0.803873	-6.47342
1110059G10Rik	-0.043114	4.76998	-0.116635	0.910927	0.96209	-6.74851
1110065P20Rik	0.263369	0.713455	0.503988	0.632105	0.808352	-5.72603
1190007I07Rik	0.133682	3.07235	0.521027	0.620873	0.801004	-6.27286
1500004A13Rik	1.59795	1.32132	3.60568	0.0111424	0.102372	-2.3962
1500009L16Rik	0.399151	-0.917842	0.818339	0.444213	0.66803	-5.70049
1500011B03Rik	0.579683	5.03428	2.92397	0.0262607	0.148551	-3.74466
1500015A07Rik	-0.0881319	2.64386	-0.362364	0.72941	0.867983	-6.39132
1500035N22Rik	0.689981	-2.03177	1.40406	0.209528	0.443536	-5.0264
1600002K03Rik	0.264429	2.77677	0.933711	0.386226	0.62019	-5.96828
1600010M07Rik	0.234921	3.7049	0.336208	0.748076	0.87862	-5.92728
1600012H06Rik	-0.326121	5.27736	-1.82574	0.117307	0.322529	-5.22703
1600012P17Rik	-0.00601163	-1.11968	-0.00478623	0.996335	0.999575	-5.15274
1600014C10Rik	0.752962	6.08911	5.1812	0.00200519	0.0558225	-1.07846
1700001D01Rik	1.09979	-3.00443	0.809727	0.448785	0.670617	-5.17023
1700001G11Rik	-0.60191	0.284615	-0.903004	0.401068	0.63407	-5.27981
1700001G17Rik	1.13473	0.319214	2.24031	0.0659837	0.234514	-4.03448
1700001O22Rik	2.14366	-2.07692	2.34427	0.0571867	0.217446	-3.72095
1700003E16Rik	-0.580677	-0.837848	-0.437461	0.676972	0.838661	-5.09688
1700008O03Rik	-0.13425	-1.50661	-0.175669	0.86629	0.940871	-5.41097
1700009J07Rik	1.18937	-0.145095	0.700416	0.50971	0.719191	-4.93465
1700010I14Rik	0.233824	0.885975	0.675027	0.524619	0.732958	-5.90435
1700012D14Rik	-0.173149	-0.99433	-0.302829	0.772169	0.892724	-5.54811
1700017B05Rik	-1.26967	5.33061	-5.04506	0.00229355	0.0582123	-1.14255
1700019D03Rik	0.613482	-0.958124	0.793618	0.457425	0.677653	-5.1116
1700020L24Rik	0.874204	-1.26512	1.35453	0.223998	0.462184	-4.78711
1700021F05Rik	0.61571	3.84859	2.36733	0.0554065	0.213643	-4.38222
1700025G04Rik	0.912094	1.69546	1.3906	0.213375	0.4486	-4.79299
1700026D11Rik	1.29263	-3.41914	1.45465	0.195636	0.426988	-4.63467
1700028K03Rik	-2.33116	-2.40356	-1.66417	0.146758	0.364396	-4.32683
1700029J07Rik	0.373151	1.73103	1.12195	0.304456	0.548106	-5.6585
1700029N11Rik	1.18937	-2.30354	0.963517	0.372228	0.610233	-4.79393
1700030C10Rik	1.54003	-0.582765	2.82506	0.0299048	0.156801	-3.21222
1700030J22Rik	-3.37757	-0.263902	-3.09852	0.0209478	0.13415	-3.15643
1700030K09Rik	0.499251	3.56261	2.21857	0.0679944	0.239246	-4.52496
1700037H04Rik	0.438924	4.44436	2.13265	0.0765792	0.254325	-4.70932
1700042O10Rik	-4.89491	-1.07949	-1.54514	0.172895	0.399889	-4.44245
1700048O20Rik	0.70221	0.124091	0.682098	0.520438	0.728797	-5.6491
1700055D18Rik	0.114985	0.792075	0.207906	0.842129	0.929284	-5.88528
1700056E22Rik	-0.09188	1.48207	-0.0857022	0.934471	0.97424	-5.77064
1700063H04Rik	2.84815	-2.93983	3.43622	0.0136994	0.111371	-2.7315
1700064M15Rik	1.93111	-1.83773	1.5984	0.160696	0.383221	-4.41419
1700065D16Rik	0.891863	-0.974821	1.00127	0.355071	0.595432	-5.04319
1700066B19Rik	0.0174965	-0.745686	0.0251119	0.980774	0.998055	-5.67162
1700066M21Rik	0.311219	3.34465	0.99118	0.359593	0.599371	-5.80093
1700071M16Rik	1.18937	-1.65781	0.997852	0.356598	0.596891	-4.77337
1700084J12Rik	0.874883	0.142121	1.40336	0.209726	0.44388	-4.86921
1700086O06Rik	-0.65548	0.569972	-1.19836	0.275631	0.51745	-5.12968
1700092M07Rik	0.581437	-2.14748	0.949327	0.378842	0.613893	-5.13351
1700094D03Rik	0.234352	2.45149	0.86024	0.422453	0.649996	-5.98669
1700096K18Rik	-0.0700782	3.02417	-0.251437	0.809804	0.911774	-6.47921
1700097N02Rik	0.329729	1.43428	1.18222	0.281517	0.523667	-5.6651
1700102H20Rik	-0.921535	-1.13706	-1.21427	0.269932	0.51147	-4.86115
1700102P08Rik	-1.07595	-1.29951	-1.06917	0.325812	0.569003	-4.93858
1700108F19Rik	1.41705	-2.51866	2.95405	0.0252496	0.14611	-3.09031
1700109H08Rik	1.3272	-0.953677	1.6961	0.140419	0.356317	-4.51466
1700110I01Rik	0.24342	-2.36133	0.381416	0.715939	0.861441	-5.6204
1700120C14Rik	-1.58466	-2.88644	-1.58821	0.162963	0.386319	-4.38589
1700120K04Rik	0.813046	-1.65334	0.677944	0.522892	0.731388	-5.26684
1700122H20Rik	-0.510878	7.33765	-1.50228	0.183339	0.412587	-5.7668
1700123O20Rik	0.280576	5.79963	1.21247	0.270573	0.512292	-6.07772
1810009A15Rik	-0.000911851	6.18402	-0.00283081	0.997832	0.999575	-6.84631
1810012K16Rik	2.25301	-2.90722	3.28196	0.016597	0.121795	-2.83666
1810013L24Rik	1.40334	4.24517	6.48795	0.000618261	0.0383662	0.270778
1810014B01Rik	0.391485	2.72448	1.60429	0.159397	0.381668	-5.22766
1810021B22Rik	-0.71455	1.67834	-1.77497	0.125877	0.335176	-4.72178
1810024B03Rik	-0.846151	-0.924634	-0.907814	0.398715	0.631243	-5.22555
1810026B05Rik	0.546246	5.38358	3.09135	0.0211415	0.134903	-3.55662
1810030O07Rik	-0.255032	6.57379	-1.68331	0.142927	0.359664	-5.52441
1810034E14Rik	-0.477671	2.72948	-2.57159	0.0419578	0.184987	-4.23825
1810044D09Rik	0.0132664	0.848554	0.0279616	0.978593	0.997266	-5.99376
1810046K07Rik	1.18937	-4.05666	0.898163	0.403447	0.63614	-4.83179
1810055G02Rik	0.492763	3.21377	1.84065	0.114901	0.319986	-4.96256
1810058I24Rik	0.258678	6.23778	1.17234	0.285175	0.527716	-6.15015
1810062G17Rik	-0.42149	-1.02669	-0.616385	0.560118	0.759325	-5.38362
1810065E05Rik	-0.046613	-0.980211	-0.115383	0.911879	0.962358	-6.62778
2010016I18Rik	0.0374428	1.81026	0.109632	0.91625	0.964409	-6.15122
2010315B03Rik	0.287102	4.45051	1.24917	0.25779	0.499709	-5.83255
2210016F16Rik	0.449078	6.51574	1.5953	0.161383	0.384172	-5.63191
2210016L21Rik	-0.0775789	5.33499	-0.456887	0.663708	0.829702	-6.66191
2210408F21Rik	0.465252	1.75279	1.6762	0.144339	0.36146	-5.22207
2210408I21Rik	0.859797	1.63209	2.84305	0.0292035	0.155437	-3.45866
2210414B05Rik	-1.21651	-1.32313	-0.741265	0.486317	0.699951	-4.98204
2300009A05Rik	-0.62371	1.96569	-0.735141	0.489777	0.702568	-5.63217
2310009A05Rik	0.223856	4.31104	0.811778	0.447693	0.670022	-6.35986
2310009B15Rik	-1.7651	2.5161	-2.76242	0.0324913	0.164189	-3.36792
2310011J03Rik	-0.46526	6.53164	-2.46979	0.0481693	0.198997	-4.42381
2310022A10Rik	-1.27485	4.41904	-3.39906	0.0143427	0.113571	-2.8539
2310022B05Rik	0.415117	2.56831	1.51136	0.181079	0.409784	-5.46261
2310033P09Rik	-0.252136	4.79079	-1.13279	0.300219	0.543959	-5.98794
2310034O05Rik	0.439562	-2.76157	0.34448	0.742152	0.875703	-5.09059
2310039H08Rik	0.385725	5.08632	1.375	0.217912	0.453777	-5.86825
2310057M21Rik	0.532954	4.15571	2.66974	0.0367677	0.173047	-4.00673
2310061I04Rik	0.148355	2.61184	0.258977	0.804245	0.908399	-6.12516
2310065F04Rik	3.60984	-3.80733	4.76807	0.00303768	0.063661	-1.86635
2410002F23Rik	0.275989	5.96964	1.55133	0.171434	0.398206	-5.70321
2410004B18Rik	0.446018	4.2639	0.600811	0.569789	0.765485	-6.3269
2410004P03Rik	0.0195901	-0.798692	0.064464	0.950679	0.982321	-6.34969
2410006H16Rik	-0.212589	5.53507	-0.745905	0.483707	0.698543	-6.51692
2410018L13Rik	0.0847848	-1.01254	0.111145	0.915099	0.963953	-5.62
2500004C02Rik	0.886085	1.11665	2.54371	0.04357	0.188414	-3.75481
2510002D24Rik	0.409523	4.60874	1.98669	0.093784	0.284377	-4.9909
2510009E07Rik	-4.25778	1.40041	-3.31723	0.0158797	0.119812	-2.98412
2510039O18Rik	0.440531	2.20705	1.12736	0.302336	0.545946	-5.65417
2610001J05Rik	0.318113	6.80767	1.22201	0.267199	0.509167	-6.11818
2610002M06Rik	1.14788	3.78824	3.55648	0.0118259	0.104612	-2.77908
2610008E11Rik	0.180861	4.19447	0.871187	0.416899	0.645882	-6.26794
2610035D17Rik	0.316826	3.22835	1.16061	0.289569	0.531554	-5.98655
2610042L04Rik	-0.123138	-1.22535	-0.306166	0.769748	0.891086	-5.94499
2610044O15Rik8	-0.0406411	3.21532	-0.127581	0.902618	0.958533	-6.50514
2610206C17Rik	-0.463257	-0.298301	-0.390344	0.709665	0.858465	-5.45677
2610301B20Rik	0.137227	4.45555	0.551076	0.601338	0.787736	-6.54268
2610306M01Rik	0.126524	2.45714	0.432377	0.680464	0.84116	-6.27276
2610318N02Rik	-1.09978	1.91157	-1.7856	0.124033	0.333345	-4.42144
2610507B11Rik	-0.27954	4.83584	-0.972394	0.368136	0.606764	-6.13267
2610528A11Rik	-1.36814	0.0450254	-0.738452	0.487904	0.701187	-4.98849
2700038G22Rik	-1.22644	2.3508	-2.43596	0.0504421	0.203722	-3.81889
2700046G09Rik	0.426875	0.500557	1.66135	0.147332	0.365388	-5.11331
2700049A03Rik	0.206908	4.58947	0.702216	0.508663	0.717967	-6.42446
2700054A10Rik	0.0263571	0.524122	0.0649624	0.950299	0.982192	-5.89495
2700062C07Rik	0.443135	4.66321	1.5328	0.175844	0.403401	-5.58537
2700081O15Rik	-0.494297	-0.1526	-0.636184	0.547969	0.748991	-5.35316
2700097O09Rik	0.0748744	3.64435	0.294363	0.778326	0.895349	-6.40234
2810001G20Rik	0.791392	2.0399	3.33649	0.0155023	0.118254	-2.93342
2810006K23Rik	-0.328466	3.50882	-1.11696	0.306423	0.549991	-5.86692
2810021J22Rik	-0.0423019	2.85853	-0.146497	0.888292	0.951955	-6.35275
2810025M15Rik	0.312276	4.26153	1.05199	0.333023	0.575402	-5.95267
2810403D21Rik	-0.401215	1.35641	-1.01287	0.349929	0.591444	-5.63864
2810408A11Rik	1.06391	1.20522	1.84057	0.114914	0.319986	-4.40462
2810408I11Rik	0.165266	0.706933	0.222704	0.831099	0.92327	-5.67619
2810429I04Rik	0.312477	-2.40036	0.217003	0.835344	0.9255	-5.12072
2900005J15Rik	0.379211	1.05333	0.711906	0.503055	0.713371	-5.79012
2900026A02Rik	-0.681406	3.00311	-0.885594	0.409674	0.640014	-5.37375
2900052N01Rik	-1.02502	1.25486	-0.530246	0.614843	0.796869	-5.07851
2900060B14Rik	-0.560672	-0.266651	-0.719485	0.498697	0.710187	-5.34806
2900076A07Rik	0.156162	1.34235	0.430706	0.681614	0.841994	-6.07288
3110001I22Rik	0.0506767	6.40915	0.289932	0.781555	0.896809	-6.80858
3110009E18Rik	0.199952	1.78258	0.504404	0.631829	0.808203	-6.11288
3110040N11Rik	0.191827	4.60355	0.838173	0.433813	0.659325	-6.32332
3110045C21Rik	1.21359	0.458154	1.96531	0.0966136	0.289771	-4.33539
3110056K07Rik	0.877324	2.68762	2.67623	0.0364493	0.172859	-3.78608
3110070M22Rik	0.637983	0.662868	1.12674	0.302575	0.54622	-5.30357
3110082I17Rik	0.018525	3.50791	0.0799318	0.938872	0.976621	-6.50122
3200001D21Rik	-1.35723	-1.62209	-1.17429	0.284451	0.526992	-4.85842
3300002I08Rik	-0.492616	1.2219	-0.799383	0.45432	0.675241	-5.58805
3830403N18Rik	0.731467	2.92542	1.35933	0.222555	0.460279	-5.50285
3830406C13Rik	0.563125	6.47213	3.20372	0.0183185	0.126439	-3.44328
4430402I18Rik	1.48498	-2.1554	2.16888	0.0728307	0.247035	-3.93019
4833411C07Rik	-0.64846	-0.551869	-0.845659	0.429934	0.656045	-5.09397
4833417C18Rik	1.12003	0.357887	2.36095	0.0558927	0.214763	-3.84188
4833418N02Rik	-0.0588653	1.70556	-0.0828753	0.936627	0.975616	-6.03273
4833419F23Rik	0.423045	1.06672	0.742137	0.485825	0.699807	-5.7227
4833420G17Rik	-0.0227121	5.74244	-0.118716	0.909346	0.96173	-6.82103
4833439L19Rik	0.134385	7.16296	0.64687	0.541481	0.745037	-6.65858
4921507G05Rik	2.08176	-1.12084	3.70847	0.0098513	0.0968436	-2.26719
4921507P07Rik	1.47944	-1.96323	0.949964	0.378543	0.613491	-4.96386
4921511C10Rik	3.58431	-0.835233	3.28001	0.0166377	0.121795	-2.72097
4921524J17Rik	0.626558	5.27461	3.01292	0.0233908	0.141749	-3.64083
4921531C22Rik	0.106693	2.13273	0.224424	0.82982	0.922266	-6.2166
4930402H24Rik	-0.765454	3.81718	-2.73148	0.0338565	0.167304	-3.72863
4930404I05Rik	-1.05638	-0.0186074	-0.890336	0.407316	0.638122	-5.11559
4930404N11Rik	-0.732057	4.24889	-2.85583	0.028716	0.154417	-3.62433
4930405A21Rik	-1.96283	-1.61268	-1.92521	0.102155	0.299162	-4.106
4930412M03Rik	1.02944	-1.47013	1.09692	0.314433	0.557649	-4.92832
4930426L09Rik	1.13834	1.52257	2.71808	0.0344666	0.1686	-3.62579
4930430F08Rik	0.186586	2.51424	0.759283	0.476235	0.69291	-6.08713
4930432K21Rik	-2.84056	1.08938	-5.57384	0.00137907	0.0505333	-0.751617
4930447J18Rik	-0.628365	-1.79927	-0.894219	0.405393	0.637039	-5.33619
4930453N24Rik	-0.341026	4.71943	-1.26157	0.253593	0.495118	-5.87938
4930455C13Rik	-0.649582	-1.91738	-1.02868	0.343012	0.585332	-5.06243
4930481A15Rik	-0.00304208	2.14118	-0.00876312	0.99329	0.999575	-6.38152
4930483J18Rik	3.0339	-3.23939	4.80883	0.00291273	0.063533	-1.59943
4930483K19Rik	0.659782	-1.94348	1.05574	0.331437	0.574426	-5.05648
4930486L24Rik	-0.00601163	-2.89359	-0.00370882	0.99716	0.999575	-5.15274
4930502E09Rik	-2.41583	-2.97708	-1.68959	0.141691	0.358152	-4.30611
4930503L19Rik	0.239604	4.68749	0.848363	0.42854	0.654795	-6.27219
4930509E16Rik	3.73442	-1.61765	5.93575	0.000992784	0.0433854	-0.724725
4930513D17Rik	2.49537	-1.55856	9.42407	7.75746e-05	0.0325152	2.06415
4930513N10Rik	0.322609	0.72529	0.543927	0.605953	0.791464	-5.54226
4930515G01Rik	0.962733	0.895072	1.49933	0.18408	0.41373	-5.00399
4930519D14Rik	4.09256	-3.90093	4.05482	0.00658361	0.0807267	-2.51445
4930523C07Rik	0.550067	5.78267	2.8712	0.0281413	0.152966	-3.79102
4930539E08Rik	0.66241	-0.985274	1.38869	0.213926	0.449069	-4.90992
4930547E14Rik	-0.25575	-2.18218	-0.195151	0.851668	0.93387	-5.14704
4930549G23Rik	-0.00854658	-0.58003	-0.0149709	0.988537	0.999575	-5.62226
4930558J18Rik	-1.02628	-0.934395	-0.939628	0.383415	0.617744	-4.86089
4930562C15Rik	-0.159049	-2.12862	-0.174734	0.866994	0.941158	-5.45865
4930562F07Rik	0.624997	-0.586251	0.819777	0.443453	0.66803	-5.16246
4930563F08Rik	4.80523	-3.76164	5.68769	0.00124157	0.0487631	-1.70833
4930579G24Rik	-0.261077	4.15144	-0.802258	0.452776	0.673547	-6.14201
4930594C11Rik	0.380237	0.303875	0.744891	0.484276	0.698666	-5.72647
4930599N23Rik	3.63328	-2.2842	2.82343	0.029969	0.157005	-3.35962
4931406C07Rik	1.43094	4.61932	7.39687	0.00030256	0.0331559	0.950444
4931406P16Rik	-0.787593	3.24075	-1.9992	0.0921671	0.28133	-4.63182
4931414P19Rik	-0.589616	3.13051	-2.47691	0.0477048	0.197914	-4.09185
4931422A03Rik	-0.287456	0.249843	-0.466576	0.657142	0.8264	-5.63172
4931428F04Rik	-2.06956	2.04534	-4.75756	0.00307088	0.064046	-1.25759
4931431C16Rik	0.789256	2.64026	2.57503	0.0417634	0.184655	-3.81237
4931440P22Rik	-1.42753	0.177823	-1.094	0.315613	0.558864	-5.03732
4932438A13Rik	-0.635793	5.91668	-2.18587	0.071139	0.244424	-4.79523
4932438H23Rik	-1.7749	-0.578333	-1.36445	0.221029	0.458039	-4.56814
4933404O12Rik	-2.36808	1.93008	-2.1848	0.0712447	0.244424	-3.93307
4933407K13Rik	-0.464229	3.43375	-1.24449	0.259391	0.501073	-5.71783
4933412E12Rik	1.86243	3.5227	8.88241	0.000108632	0.0325152	1.94858
4933427D14Rik	0.23627	3.74048	0.951958	0.377608	0.613095	-6.11034
4933430I17Rik	-2.21727	-2.11467	-1.55674	0.170165	0.396454	-4.41655
4933431G14Rik	1.18937	-2.61485	0.612086	0.562777	0.761268	-4.97411
4933433G15Rik	0.0587452	0.0686094	0.117441	0.910315	0.961847	-5.74338
4933433G19Rik	0.576441	-0.700044	0.812432	0.447345	0.669818	-5.29305
4933433H22Rik	-0.25575	-2.44896	-0.184185	0.859891	0.937548	-5.14867
4933434E20Rik	0.0645558	6.78293	0.358008	0.732505	0.869462	-6.81288
4933439K11Rik	-2.9849	-0.663281	-2.59898	0.0404354	0.180955	-3.54147
5031439G07Rik	-0.315853	6.29648	-1.70777	0.13817	0.352917	-5.4347
5330417C22Rik	-2.12807	-1.28239	-1.24709	0.258502	0.500275	-4.6643
5430402O13Rik	0.539495	-0.700677	0.628769	0.5525	0.75299	-5.52596
5430405H02Rik	-0.162509	2.54724	-0.535801	0.611224	0.794835	-6.19015
5430427O19Rik	0.42429	6.29977	2.15385	0.0743628	0.250113	-4.92041
5430437J10Rik	5.58482	0.640572	4.23175	0.00539649	0.0766495	-2.11371
5530601H04Rik	0.0119397	3.49518	0.0505861	0.961285	0.988221	-6.49657
5730405O15Rik	0.96386	0.191635	2.03772	0.087363	0.273458	-4.25272
5730409E04Rik	-3.55669	2.65232	-6.32922	0.000706111	0.0395207	-0.250941
5730420D15Rik	-0.621788	-2.34163	-0.510321	0.627918	0.80582	-5.07272
5730435O14Rik	1.41824	-1.51262	3.2368	0.0175679	0.124827	-2.84504
5730455P16Rik	0.285681	5.10136	1.20171	0.274423	0.515962	-6.01808
5730460C07Rik	2.04402	-3.18357	1.90008	0.105789	0.304991	-4.16335
5730480H06Rik	-0.276955	1.29884	-0.37348	0.721537	0.864437	-5.78425
5830416I19Rik	-0.401815	-2.58975	-0.455986	0.664321	0.829883	-5.43953
5830432E09Rik	0.110297	2.97005	0.447664	0.669989	0.83411	-6.35912
6030458C11Rik	0.0615042	5.07247	0.354113	0.735277	0.871359	-6.67965
6030468B19Rik	0.501515	1.75842	0.596371	0.572565	0.767315	-5.95025
6330418K02Rik	-0.466761	0.779508	-0.891653	0.406663	0.637797	-5.4795
6430548M08Rik	-3.63896	0.310989	-3.65048	0.010558	0.0999205	-2.78397
6430550D23Rik	2.12565	-0.93385	3.05652	0.0221099	0.138449	-2.97244
6720489N17Rik	-0.463685	2.66176	-1.0096	0.35137	0.592381	-5.6004
8030462N17Rik	-0.847265	0.30065	-1.4287	0.202654	0.435297	-4.73919
8030474K03Rik	-0.196917	-3.19011	-0.0707143	0.945906	0.979691	-5.15505
8430423G03Rik	2.92249	-3.50207	4.25756	0.00524427	0.0757022	-2.09042
8430429K09Rik	0.0126907	1.33708	0.0434613	0.966734	0.991499	-6.23634
9030025P20Rik	0.132483	5.15894	0.813691	0.446676	0.6693	-6.42074
9030404E10Rik	0.464714	-1.51521	0.682076	0.520451	0.728797	-5.33077
9130008F23Rik	2.58988	0.991446	2.70442	0.035101	0.170244	-3.35233
9130015A21Rik	-0.17622	-1.33855	-0.14663	0.888191	0.951929	-5.14937
9130401M01Rik	-0.213618	5.15462	-0.696444	0.512024	0.720932	-6.4277
9430015G10Rik	0.313854	4.18289	0.89481	0.405101	0.636928	-6.11696
9430038I01Rik	0.271414	3.46688	0.861773	0.421672	0.649542	-6.11245
9530059O14Rik	0.439562	0.657012	0.21537	0.836561	0.926187	-5.11792
9530068E07Rik	0.146474	7.57693	0.843199	0.431206	0.657377	-6.52045
9530077C05Rik	0.790281	-0.735123	1.18289	0.281273	0.52337	-5.00673
9830107B12Rik	-0.0309081	0.366014	-0.0570162	0.95637	0.985185	-6.0868
9930012K11Rik	-5.01026	0.333085	-4.78521	0.00298442	0.063533	-2.14671
9930021J03Rik	0.700457	3.03431	2.74551	0.0332299	0.165977	-3.70233
9930104L06Rik	-0.315616	4.05901	-0.918585	0.393484	0.627219	-6.14791
a	0.602	-2.37225	0.875926	0.414512	0.64411	-5.20694
A130010J15Rik	-0.0896671	3.7275	-0.298447	0.775354	0.894448	-6.50188
A330040F15Rik	1.29263	-1.38843	1.16455	0.288086	0.530088	-4.90876
A3galt2	-1.12178	-2.62736	-0.583381	0.580731	0.773001	-5.05736
A430005L14Rik	0.282123	5.80453	1.61441	0.15719	0.378886	-5.5928
A4galt	0.439562	-2.60427	0.240219	0.818098	0.916233	-5.11361
A530032D15Rik	0.349028	6.07117	1.5426	0.173498	0.400462	-5.72747
A530040E14Rik	0.19894	6.65384	0.803105	0.452322	0.673195	-6.55051
A530076I17Rik	1.18937	-2.95149	0.590628	0.576167	0.770218	-4.98303
A630001G21Rik	0.461067	3.57495	1.9537	0.0981861	0.292508	-4.85956
A630095N17Rik	-0.145752	-3.0412	-0.238188	0.819603	0.916983	-5.54471
A830005F24Rik	0.0447857	0.197297	0.0448365	0.965682	0.990666	-5.60279
A930005H10Rik	0.87568	2.82578	2.78621	0.0314819	0.161245	-3.59464
A930007I19Rik	0.0211992	-0.747551	0.0280875	0.978497	0.997266	-5.68375
A930024E05Rik	0.370608	0.789349	0.677297	0.523275	0.731759	-5.77897
AA465934	0.065304	-1.72079	0.062068	0.95251	0.98333	-5.47565
AA467197	-0.157224	-1.01933	-0.190857	0.854886	0.935625	-5.61402
AA986860	0.450394	-1.43373	0.419173	0.689575	0.847526	-5.35411
Aaas	-0.374574	5.42554	-1.60397	0.159468	0.381709	-5.48689
Aacs	-1.11944	6.43839	-5.14922	0.00206904	0.056437	-1.09445
Aagab	-0.118766	6.77781	-0.605252	0.567021	0.764259	-6.67312
Aak1	-0.412649	3.66569	-1.59377	0.161723	0.384597	-5.29782
Aamdc	-0.0777688	3.76958	-0.32355	0.757178	0.88379	-6.58373
Aamp	-0.211681	7.80267	-1.43945	0.19972	0.431608	-5.87668
Aanat	-0.0977941	-2.19184	-0.171865	0.869152	0.941936	-5.70387
Aar2	-0.122552	5.83232	-0.6148	0.561097	0.760041	-6.60637
Aars	-0.398578	6.80426	-2.25097	0.0650207	0.232423	-4.72091
Aars2	-1.80898	4.12848	-4.5859	0.0036754	0.0682727	-1.40648
Aarsd1	-0.813881	5.57615	-3.56528	0.0117003	0.104118	-2.84307
Aasdh	-0.871969	3.82668	-3.52989	0.0122143	0.105942	-2.71119
Aasdhppt	0.312293	5.49223	1.73003	0.133974	0.34646	-5.43391
Aatf	0.444878	5.6691	2.22255	0.0676216	0.238288	-4.749
Aatk	2.20226	-1.85303	1.70531	0.13864	0.35339	-4.30449
AB124611	0.193984	5.01957	0.754777	0.478742	0.694607	-6.34875
Abat	1.76434	-0.499504	2.79252	0.0312197	0.160642	-3.27607
Abca1	-2.11215	0.793591	-3.30973	0.0160293	0.120193	-2.71141
Abca13	2.37929	0.235537	1.28184	0.246857	0.488013	-4.83821
Abca17	-0.329894	1.68952	-0.932935	0.386595	0.620703	-5.69488
Abca2	-1.17308	4.25688	-3.11017	0.0206374	0.133184	-3.2522
Abca3	-1.21854	5.73848	-3.49997	0.0126684	0.10736	-2.88216
Abca4	0.671153	-1.9684	1.92688	0.101918	0.298678	-4.50383
Abca5	0.289896	2.28187	0.965317	0.371395	0.609388	-6.15892
Abca6	0.165376	0.894887	0.670408	0.527362	0.734743	-6.25704
Abca7	-2.05806	6.20636	-5.10505	0.00216105	0.0574658	-1.04748
Abca8a	2.03792	-2.40684	1.73909	0.132302	0.344801	-4.27732
Abca8b	0.234037	-1.14576	0.300954	0.773531	0.893633	-5.5227
Abca9	0.370244	1.05604	0.362438	0.729358	0.867983	-5.2955
Abcb10	0.229831	4.79844	0.448845	0.669183	0.833396	-6.54627
Abcb1a	-0.33347	4.37935	-0.940747	0.382885	0.617209	-5.70951
Abcb1b	-0.057912	4.78189	-0.192702	0.853503	0.934997	-6.68118
Abcb4	1.49457	1.97371	3.02873	0.0229174	0.139983	-3.25022
Abcb6	-2.4066	2.42595	-3.92762	0.00761765	0.0858548	-2.04225
Abcb7	0.530894	4.5602	1.85265	0.113001	0.316439	-5.15485
Abcb8	-0.00731549	5.44036	-0.0330736	0.974681	0.995272	-6.77522
Abcb9	-0.535133	0.598172	-1.09939	0.313437	0.556758	-5.33429
Abcc1	-0.665992	6.62193	-1.96174	0.0970944	0.290906	-5.15191
Abcc10	-1.65599	2.84008	-3.84269	0.0084085	0.0898684	-2.15383
Abcc3	-1.34121	1.0176	-0.924543	0.390613	0.624567	-5.09985
Abcc5	0.0760098	4.09442	0.198434	0.84921	0.932642	-6.61064
Abcc9	-0.564487	-2.18575	-0.279349	0.789288	0.900851	-5.14227
Abcd1	-1.01211	7.6731	-3.67656	0.0102334	0.0983028	-2.83093
Abcd2	-2.49083	1.22809	-3.09603	0.0210149	0.134303	-2.9466
Abcd3	-0.441029	4.27279	-1.80724	0.120361	0.327805	-5.09788
Abcd4	-0.476566	3.31961	-1.53546	0.175204	0.402826	-5.29297
Abce1	-0.175685	7.38268	-1.17541	0.284034	0.526444	-6.16774
Abcf1	-0.157901	7.1759	-0.841045	0.432322	0.658234	-6.50826
Abcf2	-0.438666	6.85714	-2.84308	0.0292023	0.155437	-3.91222
Abcf3	-0.223604	6.17455	-1.4647	0.192981	0.424371	-5.79431
Abcg1	0.0399689	7.29984	0.161727	0.87679	0.944434	-6.84773
Abcg2	0.979379	4.84926	1.40485	0.209306	0.443368	-5.82209
Abcg3	1.22917	6.50861	3.77507	0.00910364	0.0934801	-2.55887
Abcg4	-3.61304	-1.20686	-1.91515	0.103595	0.301751	-4.1138
Abhd1	-0.229184	-1.49995	-0.280294	0.788596	0.900392	-5.39401
Abhd10	0.312321	4.76383	1.62617	0.154663	0.37507	-5.44474
Abhd11	0.0360602	4.64264	0.155365	0.881591	0.94731	-6.7096
Abhd12	0.439849	5.34724	0.746856	0.483172	0.698047	-6.17147
Abhd13	0.238902	2.65439	0.682078	0.520451	0.728797	-6.06713
Abhd14a	0.29189	1.81033	0.970014	0.369229	0.607581	-6.00932
Abhd14b	-0.754003	2.65964	-3.76102	0.00925603	0.0942119	-2.47391
Abhd16a	-0.490039	6.7425	-2.5349	0.0440926	0.190012	-4.35111
Abhd16b	-0.00601163	-1.40575	-0.00482459	0.996306	0.999575	-5.15274
Abhd17a	1.06802	2.87383	2.68654	0.0359499	0.171948	-3.84838
Abhd17b	0.687884	3.89983	2.23731	0.0662581	0.235019	-4.71764
Abhd17c	0.576453	1.78675	1.45096	0.19662	0.427889	-5.08162
Abhd18	0.23199	3.18891	0.94734	0.379775	0.614603	-6.05142
Abhd4	-0.445081	5.93891	-2.85996	0.0285601	0.153979	-3.87827
Abhd5	-0.423251	4.38444	-1.62921	0.154016	0.374508	-5.32281
Abhd6	0.571531	5.90663	2.67286	0.0366142	0.172969	-4.17196
Abhd8	-0.26122	4.08333	-0.811822	0.447669	0.670022	-6.20855
Abi1	0.096623	7.96109	0.653046	0.537753	0.741997	-6.67548
Abi2	0.294928	4.62118	1.06042	0.329466	0.57293	-6.02015
Abi3	-1.04192	7.01328	-4.87376	0.0027255	0.0628555	-1.39345
Abitram	-0.186412	4.92501	-0.778181	0.465816	0.683847	-6.37607
Abl1	-0.94419	5.87467	-4.34386	0.00476915	0.0737573	-1.87028
Abl2	0.532677	3.52404	1.81855	0.118485	0.324833	-5.02118
Ablim1	-0.301124	5.74645	-0.415819	0.691898	0.848407	-6.80921
Ablim2	-0.00601163	-2.26611	-0.00405544	0.996895	0.999575	-5.15274
Abr	-0.670297	6.43104	-3.85132	0.00832411	0.0894602	-2.53076
Abracl	0.100939	7.02164	0.324034	0.756829	0.883631	-6.82174
Abraxas1	0.328177	4.49141	1.79116	0.123079	0.331724	-5.26062
Abraxas2	0.200057	5.80769	1.0419	0.337316	0.579757	-6.21702
Abt1	0.510056	4.83663	2.18943	0.0707897	0.244113	-4.73911
Abtb1	0.094601	5.03222	0.569377	0.589612	0.778891	-6.6279
Abtb2	-0.19306	2.62198	-0.316618	0.762181	0.886801	-6.16887
AC139209.1	1.11982	4.44232	3.56294	0.0117335	0.104118	-2.7412
Acaa1a	-0.180459	7.08829	-1.01496	0.349009	0.590497	-6.32992
Acaa1b	-0.0912539	5.40329	-0.417481	0.690747	0.848133	-6.66833
Acaa2	-0.0533073	5.59892	-0.276054	0.7917	0.902358	-6.76297
Acaca	0.263981	4.35619	0.853691	0.425801	0.652744	-6.19977
Acacb	-1.58466	-1.77039	-1.00366	0.354006	0.594287	-4.83131
Acad10	0.457284	2.81223	1.85653	0.112392	0.315232	-4.86504
Acad11	0.264525	4.14918	1.05506	0.331725	0.57467	-6.06665
Acad12	0.0163836	1.58363	0.0319665	0.975528	0.995664	-6.06151
Acad8	0.729217	4.9924	3.33391	0.0155522	0.118344	-3.1902
Acad9	0.337337	6.11073	2.18722	0.0710065	0.244166	-4.81353
Acadl	-0.236819	6.74282	-0.806014	0.450766	0.671924	-6.5156
Acadm	0.0236645	6.23677	0.13584	0.896358	0.95573	-6.82553
Acads	-0.438648	5.40205	-2.71536	0.0345921	0.168752	-4.06697
Acadvl	-0.0482262	6.92232	-0.261244	0.802576	0.90751	-6.8448
Acap1	-0.543569	6.92725	-2.52359	0.0447741	0.191769	-4.40091
Acap2	0.17611	6.52376	0.707421	0.505646	0.715344	-6.57863
Acap3	-0.497506	2.89444	-1.30694	0.238738	0.478237	-5.457
Acat1	-0.131536	6.73912	-0.887953	0.4085	0.638525	-6.45104
Acat2	0.496235	6.31858	2.80108	0.0308678	0.15936	-3.9982
Acat3	0.600873	4.46742	2.68797	0.035881	0.171871	-4.0604
Acbd3	0.453081	3.91408	2.13197	0.0766511	0.254325	-4.62314
Acbd4	-0.472083	3.66873	-1.9247	0.102228	0.299303	-4.97673
Acbd5	0.526313	6.79988	2.82737	0.0298138	0.156588	-3.9871
Acbd6	-0.799868	3.45426	-0.637493	0.547172	0.748608	-5.84717
Accs	-0.153872	3.03231	-0.625011	0.554804	0.754758	-6.14284
Acd	-0.458269	5.93958	-2.54855	0.0432852	0.187705	-4.30552
Ace	-0.17926	1.6226	-0.0825742	0.936856	0.975675	-5.44768
Ace2	0.439562	-1.25393	0.262164	0.801899	0.907033	-5.10942
Acer2	-1.92957	-1.59564	-1.72423	0.135054	0.347606	-4.27489
Acer3	0.269436	6.60777	1.28214	0.246759	0.487897	-6.02092
Ache	1.69441	0.104892	1.52842	0.176902	0.404481	-4.84233
Acin1	-0.332062	7.24581	-1.72505	0.1349	0.347321	-5.48928
Ackr1	1.61825	1.24758	1.6294	0.153976	0.374508	-4.60454
Ackr2	0.381947	0.618833	0.258441	0.80464	0.908476	-5.693
Ackr3	-0.00601163	-2.8731	-0.00352451	0.997301	0.999575	-5.15274
Ackr4	-1.08106	-2.94306	-0.574654	0.586257	0.776842	-5.05882
Acly	-0.665147	7.97372	-2.55432	0.0429489	0.187107	-4.36637
Aco2	0.0924523	7.59977	0.459402	0.662	0.828807	-6.78551
Acot1	-2.16906	0.736838	-2.63	0.0387818	0.177464	-3.4148
Acot10	-0.0417914	2.28154	-0.144372	0.889899	0.952532	-6.23482
Acot11	-1.16799	2.70754	-2.84724	0.0290424	0.155163	-3.44506
Acot13	0.306025	5.02031	1.18233	0.28148	0.523667	-6.0765
Acot2	-1.03537	3.37979	-2.4433	0.0499398	0.20328	-3.99075
Acot7	0.055862	5.59289	0.168037	0.872034	0.94279	-6.46098
Acot8	0.552895	4.2365	2.86522	0.0283634	0.153548	-3.7137
Acot9	-0.244273	5.72176	-1.28062	0.247258	0.4882	-5.97236
Acox1	-0.234118	4.85293	-1.15733	0.290806	0.533033	-6.00929
Acox3	-0.897443	6.76252	-4.43485	0.00431992	0.0721098	-1.84757
Acp1	0.0129159	6.50982	0.0593373	0.954596	0.984256	-6.85686
Acp2	0.74978	4.72228	1.73081	0.133828	0.34646	-4.99651
Acp5	0.52885	6.47762	1.2393	0.261174	0.503197	-6.00321
Acp6	0.0994864	5.25197	0.537473	0.610138	0.794088	-6.60155
Acrbp	-0.232019	1.45992	-0.31605	0.762591	0.887022	-5.94719
Acsbg1	2.72578	0.0579688	2.17997	0.0717219	0.245143	-4.04304
Acsbg3	-0.886505	-0.539225	-1.26204	0.253435	0.494978	-4.76805
Acsf2	-1.6247	4.27008	-5.23567	0.00190152	0.0557532	-0.803683
Acsf3	-0.893376	3.63889	-2.90916	0.0267742	0.15002	-3.34628
Acsl1	0.0352189	6.14193	0.169231	0.871135	0.942686	-6.85732
Acsl3	1.60919	-0.00287749	0.734012	0.490416	0.702861	-5.09445
Acsl4	0.587359	5.80339	3.27922	0.0166543	0.121795	-3.33353
Acsl5	0.273485	8.08111	1.2801	0.24743	0.4882	-6.08052
Acss1	-0.0190347	5.77996	-0.0337472	0.974165	0.995092	-6.78495
Acss2	0.657183	4.27532	3.07767	0.0215161	0.136313	-3.4469
Acta1	-1.45523	5.06212	-6.173	0.000806801	0.040369	0.0490565
Acta2	-2.3933	-1.79956	-1.1777	0.283186	0.525591	-4.72183
Actb	-2.27525	13.8925	-6.79858	0.000480155	0.0351526	0.373984
Actg1	-0.710427	10.0316	-4.20974	0.00553023	0.0771122	-2.20463
Actl6a	0.104551	6.56412	0.659717	0.533745	0.739403	-6.61909
Actn1	-0.730249	5.13237	-2.56602	0.0422745	0.185921	-3.85924
Actn4	-1.20138	7.63732	-5.88335	0.0010402	0.0442122	-0.354565
Actr10	0.148658	6.08367	0.688335	0.516769	0.725359	-6.57837
Actr1a	-0.310464	7.37857	-2.0266	0.0887225	0.275559	-5.08648
Actr1b	-1.17205	6.04725	-6.26459	0.000745915	0.0398118	0.0701154
Actr2	-0.0968923	9.92999	-0.606608	0.566177	0.763868	-6.7525
Actr3	0.0109037	10.4799	0.0716683	0.945178	0.979348	-6.95586
Actr3b	-0.363794	1.35435	-0.300187	0.774089	0.894033	-6.0801
Actr5	0.23947	1.22545	0.581315	0.582037	0.773907	-5.8734
Actr6	-0.391756	4.96078	-1.3318	0.230934	0.469573	-5.82396
Actr8	0.172415	5.73623	0.894698	0.405157	0.636928	-6.39679
Actrt3	0.00998497	-2.04053	0.00858378	0.993427	0.999575	-5.67688
Acvr1	1.58829	1.74017	5.37325	0.00166571	0.0534802	-0.645736
Acvr1b	-0.83481	3.86656	-2.74076	0.0334409	0.166376	-3.60675
Acvr1c	0.439562	-2.53376	0.374922	0.720518	0.8639	-5.08239
Acvr2a	0.881611	4.18435	4.22672	0.00542674	0.0766495	-2.02285
Acvr2b	0.0459523	0.359088	0.103689	0.92077	0.96689	-6.09968
Acvrl1	-0.131712	4.65816	-0.311493	0.765888	0.888774	-6.16488
Acy1	-0.857407	2.35381	-3.88105	0.00804053	0.0880768	-2.30607
Acy3	-1.27599	-1.38399	-0.82202	0.442269	0.666976	-4.93861
Acyp1	0.478621	3.67771	1.95264	0.0983312	0.292652	-4.95412
Ada	-0.187744	3.95268	-0.827286	0.4395	0.663822	-6.15693
Adal	0.0262073	3.90689	0.109382	0.91644	0.964465	-6.6341
Adam10	-0.0558154	6.30186	-0.339258	0.745889	0.877316	-6.79991
Adam11	-1.48819	5.72628	-2.84846	0.0289958	0.154982	-3.91237
Adam15	-0.389063	3.56868	-1.27794	0.248143	0.489257	-5.59858
Adam17	-0.142388	7.34503	-0.788464	0.460215	0.679483	-6.54101
Adam19	-0.830133	7.57824	-2.97937	0.0244313	0.144046	-3.74689
Adam2	2.90511	-3.67383	3.64199	0.0106661	0.100362	-2.54372
Adam22	0.871812	4.06829	2.115	0.078476	0.257187	-4.33022
Adam23	-1.12502	4.00467	-1.52664	0.177332	0.405167	-4.69724
Adam30	3.87584	-2.55434	3.28424	0.0165496	0.121795	-2.84979
Adam4	-3.09638	-2.10346	-3.11445	0.0205244	0.1328	-3.15217
Adam8	1.36142	6.15397	3.24482	0.0173911	0.124459	-2.90501
Adam9	-0.391857	3.60649	-0.979165	0.365039	0.604066	-5.67774
Adamdec1	-2.4653	0.761513	-2.09846	0.0802972	0.260609	-3.95834
Adamts1	-1.02628	-2.6235	-0.469137	0.655412	0.82567	-5.1001
Adamts10	-1.30264	4.76146	-2.84945	0.0289583	0.154912	-3.67789
Adamts13	-0.752494	-0.0362579	-0.395521	0.706038	0.856395	-5.11796
Adamts14	-0.871498	-1.82872	-0.326329	0.755176	0.88288	-5.1402
Adamts3	0.403511	-0.034738	0.282179	0.787217	0.899367	-5.46651
Adamts6	0.151298	0.988675	0.383526	0.714454	0.860548	-6.26383
Adamtsl2	0.767949	-1.23178	1.6364	0.152497	0.372305	-4.99801
Adamtsl4	-0.400564	1.54587	-0.866393	0.419325	0.647938	-5.54821
Adap1	0.0989724	3.16342	0.185844	0.858646	0.93683	-5.81139
Adap2	-0.798543	5.12263	-4.03802	0.00671073	0.0818143	-2.20446
Adar	-0.59096	6.82333	-3.7681	0.00917889	0.0938975	-2.6979
Adat1	0.333374	2.73251	1.12034	0.305089	0.548603	-5.83328
Adat2	0.919216	1.85622	1.85089	0.113277	0.316925	-4.63665
Adat3	0.636269	1.60505	2.00249	0.0917464	0.280805	-4.45678
Adck1	0.194456	5.09044	1.01993	0.346826	0.588362	-6.21231
Adck2	-1.20948	5.57919	-4.78853	0.00297423	0.063533	-1.39259
Adck5	-0.803877	3.96105	-2.13397	0.0764392	0.2542	-4.59051
Adcy3	-0.126533	1.6822	-0.426326	0.684632	0.843971	-6.11676
Adcy4	2.48349	-0.758638	1.00814	0.352015	0.592871	-4.87469
Adcy5	-0.926112	-0.866339	-2.53562	0.0440496	0.189892	-3.85445
Adcy6	-2.3175	3.0066	-1.20618	0.272819	0.514112	-4.90789
Adcy7	-0.743179	7.22834	-2.6456	0.0379776	0.175742	-4.21594
Adcy9	2.24439	1.03994	3.61352	0.0110376	0.101698	-2.38329
Add1	0.355154	6.42792	1.25226	0.256737	0.49916	-6.05939
Add2	1.92053	0.0277061	2.02406	0.0890362	0.27612	-4.3835
Add3	0.185152	6.47307	0.742032	0.485885	0.699807	-6.49197
Adgb	-0.872068	-0.412022	-0.76033	0.475653	0.692391	-4.96302
Adgra2	0.0759884	2.69426	0.0966044	0.926163	0.970419	-5.67474
Adgrd1	-0.564487	-2.20268	-0.407658	0.697568	0.851614	-5.10798
Adgre1	0.752923	5.26033	0.897261	0.403892	0.636291	-5.76288
Adgre4	1.49304	3.13342	1.81118	0.119704	0.326731	-4.45986
Adgre5	-1.1898	7.84491	-4.06471	0.00651005	0.0807067	-2.32133
Adgrf3	-1.38173	-0.912033	-1.01049	0.350978	0.592381	-4.82201
Adgrf5	-0.752494	-0.578322	-0.246805	0.813226	0.913455	-5.15545
Adgrg1	0.764848	3.76673	0.676227	0.523908	0.732232	-6.42322
Adgrg3	0.649627	0.536279	1.47558	0.190142	0.420732	-5.31372
Adgrg5	-1.30021	6.55721	-6.93301	0.000431621	0.0339041	0.632227
Adgrg6	1.78818	1.68447	0.556016	0.598159	0.785167	-5.1837
Adgrg7	-3.50505	-1.59391	-1.43059	0.202136	0.434785	-4.53153
Adgrl1	-0.255692	1.72835	-0.378848	0.717748	0.862424	-5.7858
Adgrl2	1.17695	0.858425	3.22723	0.0177816	0.124959	-2.98382
Adgrl3	-2.17818	1.97229	-1.11724	0.306314	0.549991	-4.76208
Adgrl4	1.1159	-0.187548	1.34776	0.226043	0.464935	-5.07787
Adh5	-0.129093	6.98862	-0.672397	0.52618	0.73392	-6.62602
Adhfe1	-1.94014	-2.08794	-1.42772	0.202923	0.435571	-4.51947
Adi1	-0.74777	5.61754	-3.49969	0.0126728	0.10736	-3.00348
Adipoq	1.18937	-2.42992	0.795521	0.456398	0.676897	-4.88752
Adipor1	-0.280534	5.87814	-0.475055	0.651423	0.823049	-6.58377
Adipor2	-0.397057	6.6332	-1.33907	0.228692	0.467133	-5.97282
Adk	0.229847	6.6744	1.43845	0.19999	0.431955	-5.87819
Adm	-0.0748245	0.934264	-0.0581147	0.95553	0.984602	-5.44636
Adnp	0.850832	5.31179	3.28721	0.016488	0.121762	-3.29322
Adnp2	0.361949	3.46457	1.50886	0.1817	0.410487	-5.38786
Ado	0.958479	5.38085	4.53895	0.00386331	0.0701436	-1.70487
Adora2a	-0.291348	6.19909	-1.01943	0.347044	0.588491	-6.18989
Adora2b	0.666831	2.39648	1.19599	0.27649	0.518432	-5.41415
Adora3	1.21084	5.19214	5.73605	0.00118795	0.048025	-0.449869
Adpgk	0.209968	6.71988	0.86459	0.42024	0.648645	-6.48952
Adprh	-0.139026	6.92199	-0.924878	0.390452	0.624391	-6.40389
Adprm	-0.531344	4.0981	-2.252	0.0649282	0.232423	-4.50832
Adra1b	-1.28828	-2.44421	-1.69333	0.140959	0.357101	-4.3986
Adrb2	0.985949	7.0595	1.47277	0.190871	0.421738	-5.77948
Adrm1	0.0691073	7.31807	0.440292	0.675031	0.837614	-6.78109
Adsl	0.186372	6.32427	1.22432	0.266386	0.508248	-6.08298
Adss	0.348793	6.762	1.78061	0.124896	0.333927	-5.41552
Adssl1	-0.33888	3.98892	-0.32289	0.757653	0.884234	-6.5536
Adtrp	-0.538888	-0.306146	-1.02192	0.345957	0.587451	-5.44614
Aebp1	-2.41583	-1.64294	-1.46853	0.191977	0.423427	-4.4913
Aebp2	0.824076	5.25581	3.58607	0.0114095	0.10336	-2.73854
Aen	0.021763	5.35036	0.109236	0.916551	0.9645	-6.76051
Afap1	1.84722	2.47101	4.78119	0.0029968	0.063533	-1.19155
Afap1l1	-2.43316	-0.313494	-1.4796	0.189102	0.419665	-4.5984
Afap1l2	-0.00601163	-3.10275	-0.00286387	0.997807	0.999575	-5.15275
Afdn	-1.27611	3.08641	-1.98833	0.0935706	0.283938	-4.257
Aff1	-0.574094	4.55642	-1.78022	0.124963	0.334005	-5.22538
Aff3	1.12044	2.89832	4.14068	0.00597452	0.0786416	-2.12074
Aff4	0.525574	4.89739	2.07514	0.0829384	0.265207	-4.89155
Afg1l	0.861142	2.98651	4.11081	0.00617901	0.0793868	-2.02471
Afg3l1	-0.41728	6.86116	-2.70991	0.0348446	0.169391	-4.09763
Afg3l2	-0.0787499	5.29854	-0.176138	0.865937	0.940871	-6.59684
Afmid	-0.569183	4.12922	-2.94768	0.0254601	0.146658	-3.64075
Aftph	-0.224512	6.63148	-0.892807	0.406092	0.637491	-6.40208
Aga	0.581713	5.36143	3.25595	0.0171489	0.123248	-3.34743
Agap1	-1.61839	0.421597	-1.55927	0.169576	0.395751	-4.40991
Agap2	-1.46706	2.44478	-3.33566	0.0155184	0.118304	-2.71011
Agap3	-0.49347	2.28253	-1.34321	0.227426	0.466236	-5.24544
Agbl1	1.62155	-1.60003	4.2887	0.00506694	0.0748978	-1.68373
Agbl2	0.439562	-1.78366	0.299901	0.774297	0.894143	-5.1014
Agbl3	-0.827005	1.2754	-2.0333	0.0879014	0.273969	-4.38775
Agbl5	-1.31353	1.22544	-2.67127	0.0366922	0.172969	-3.44616
Ager	0.738396	-0.371719	1.11852	0.305806	0.549495	-4.98138
Agfg1	0.5198	2.75524	1.15498	0.291697	0.53396	-5.64085
Agfg2	-1.65426	4.65106	-2.56005	0.0426169	0.186727	-3.88669
Aggf1	0.0102723	4.24049	0.0152151	0.98835	0.999575	-6.52811
Agk	0.670649	4.77423	2.92801	0.0261223	0.148501	-3.70767
Agl	-0.768741	3.94589	-2.62045	0.039283	0.178072	-3.83213
Agmo	-0.291525	1.29906	-0.551688	0.600943	0.787572	-5.82085
Ago1	-0.0269592	3.63387	-0.0857204	0.934457	0.97424	-6.52376
Ago3	0.244655	3.78345	0.652995	0.537784	0.741997	-6.3749
Ago4	0.143174	3.08345	0.443033	0.673154	0.836525	-6.48077
Agpat1	-1.37267	5.58004	-5.19251	0.00198315	0.0557532	-0.910728
Agpat2	-0.15986	-0.45049	-0.449814	0.668523	0.832952	-5.94087
Agpat3	-0.311426	4.99366	-0.929679	0.38815	0.622153	-6.09979
Agpat4	-0.37532	4.88449	-1.16275	0.288761	0.530779	-5.63551
Agps	0.743857	4.8751	2.826	0.0298675	0.156801	-3.85354
Agrn	0.118501	2.45314	0.159633	0.87837	0.945485	-5.96855
Agtpbp1	-0.471279	4.14834	-1.79228	0.122888	0.331499	-5.07393
Agtrap	-0.179076	5.53355	-1.0774	0.322402	0.565959	-6.24123
Ahctf1	0.457149	4.69618	1.6815	0.143284	0.360199	-5.35703
Ahcy	-1.06223	5.04729	-5.03515	0.00231632	0.0582123	-1.02478
Ahcyl1	0.565523	4.57964	3.21689	0.0180156	0.125825	-3.27863
Ahcyl2	0.618616	4.99448	1.98599	0.0938759	0.284377	-4.91066
Ahdc1	-2.67064	2.59551	-7.68131	0.000245529	0.0331559	0.893802
Ahi1	0.787306	3.68531	3.77554	0.00909861	0.0934801	-2.58449
Ahnak	0.151903	7.09192	0.330562	0.752131	0.880891	-6.88349
Ahr	-2.38794	3.20994	-3.90092	0.0078569	0.0870066	-2.16014
Ahrr	-1.77537	0.438869	-1.03475	0.340388	0.583019	-4.81414
Ahsa1	0.26766	7.12693	1.68598	0.142399	0.358846	-5.54198
Ahsa2	0.209444	3.66032	0.958792	0.37442	0.611116	-6.11296
AI182371	2.89715	-1.63838	2.55372	0.0429837	0.187117	-3.49409
AI413582	-0.521121	5.95532	-2.1139	0.0785959	0.257379	-4.89394
AI427809	0.0642097	-1.57546	0.149625	0.885927	0.950324	-5.86103
AI463229	1.30288	-1.09884	2.67453	0.0365327	0.172924	-3.50511
AI467606	-0.103196	7.41608	-0.511924	0.62686	0.804879	-6.76966
AI597479	-0.294663	4.71516	-1.48472	0.187787	0.418421	-5.58492
AI837181	0.893033	3.22717	2.68114	0.0362105	0.172228	-3.92356
AI987944	0.520181	5.36906	1.86792	0.110627	0.312328	-5.24403
Aif1	-0.085278	6.23304	-0.128894	0.901623	0.95838	-6.49943
Aif1l	0.562681	-1.27576	0.365992	0.726837	0.866782	-5.07909
Aifm1	-0.116605	5.66728	-0.655589	0.536223	0.741068	-6.53988
Aifm2	-1.10508	2.0983	-2.01744	0.0898596	0.277218	-4.21458
Aig1	0.211127	2.99198	0.594612	0.573666	0.768147	-6.11652
Aim2	0.305309	6.13581	1.8302	0.116582	0.321891	-5.29461
Aimp1	0.142078	5.06625	0.533817	0.612515	0.79557	-6.59401
Aimp2	0.330016	5.40396	1.9336	0.100969	0.29681	-5.1057
Aip	0.434076	6.76028	2.66447	0.0370284	0.173656	-4.17907
Aipl1	-1.94014	-1.90653	-1.98006	0.094653	0.286117	-4.06007
Aire	-2.4653	0.947765	-2.43352	0.0506104	0.204069	-3.68121
Ajm1	-2.90991	-0.211867	-2.65202	0.0376517	0.17504	-3.5004
Ajuba	1.02782	-0.851073	1.0509	0.333482	0.57596	-4.96358
Ak2	0.204856	7.53608	0.972946	0.367883	0.606531	-6.38465
Ak3	0.140224	5.55893	0.556466	0.59787	0.784954	-6.5986
Ak6	0.186927	7.37776	0.928119	0.388897	0.622948	-6.42558
Ak8	-0.0958512	1.32192	-0.479413	0.648494	0.820853	-6.68026
Ak9	-2.51343	-1.58928	-1.43554	0.200783	0.433036	-4.51936
Akap1	1.87562	1.4443	4.08195	0.00638395	0.0801125	-1.8814
Akap10	0.463229	4.50409	1.56143	0.169074	0.395398	-5.42348
Akap11	0.762464	5.59276	3.88707	0.00798434	0.087927	-2.51223
Akap12	0.0439911	1.82599	0.193677	0.852772	0.934436	-6.51077
Akap13	-0.512821	8.22574	-1.54969	0.17182	0.398515	-5.74234
Akap17b	0.124274	2.86774	0.284263	0.785694	0.898702	-6.19657
Akap5	-2.90291	1.38482	-5.49023	0.00149111	0.0522433	-1.01768
Akap7	0.891086	1.96912	2.62901	0.0388335	0.177464	-3.64881
Akap8	-0.394524	7.34742	-1.55939	0.169548	0.395751	-5.7138
Akap8l	-0.394662	5.86952	-1.46249	0.193562	0.425015	-5.77732
Akap9	0.432917	6.96585	1.17236	0.285169	0.527716	-6.18472
Akip1	0.0413152	4.91556	0.184338	0.859776	0.937505	-6.72911
Akirin2	-0.03772	2.00519	-0.0658408	0.949628	0.981908	-5.98759
Akna	-2.93145	7.43018	-8.92654	0.000105622	0.0325152	2.00962
Akr1a1	-0.136781	8.81524	-0.891856	0.406562	0.637797	-6.50676
Akr1b10	0.650291	3.82562	2.27763	0.0626746	0.228913	-4.36556
Akr1b3	0.0767361	7.42838	0.463048	0.659529	0.827646	-6.77393
Akr1b8	0.303731	-0.19968	0.28512	0.785067	0.898347	-5.48513
Akr1c13	-0.924199	2.65817	-2.55953	0.0426469	0.186727	-3.81051
Akr1e1	0.748462	4.50548	2.26767	0.063541	0.230318	-4.63266
Akt1	0.198308	4.76282	1.00987	0.351251	0.592381	-6.10746
Akt1s1	-0.682403	4.85842	-2.40914	0.0523245	0.207476	-4.34812
Akt2	-0.773505	6.34513	-4.70562	0.00324106	0.0656805	-1.52499
Akt3	1.0387	3.6354	3.17237	0.0190622	0.128275	-3.21305
Aktip	0.237319	4.68764	1.24499	0.259218	0.500949	-5.96718
Alad	0.63796	5.57454	4.14127	0.00597059	0.0786416	-2.19812
Alas1	0.155746	6.16008	0.615717	0.56053	0.759545	-6.64169
Alas2	1.2044	3.28825	2.20485	0.0692959	0.241311	-4.59861
Aldh18a1	-0.41276	6.21388	-1.46509	0.192878	0.424284	-5.76257
Aldh1a2	-0.752494	0.690178	-0.481576	0.647042	0.820136	-5.08887
Aldh1a3	0.475299	-0.753704	0.587456	0.578162	0.771484	-5.32744
Aldh1b1	-0.322469	5.41925	-1.42697	0.20313	0.435866	-5.81708
Aldh1l1	-3.69639	-1.81345	-3.93555	0.0075481	0.0856931	-2.61494
Aldh2	-0.795786	7.35646	-5.48194	0.00150277	0.0522433	-0.773852
Aldh3a1	0.439562	-3.54407	0.175296	0.866571	0.940871	-5.12389
Aldh3a2	-0.415142	6.04683	-2.40365	0.0527186	0.208439	-4.49445
Aldh3b1	0.304081	6.50754	1.54651	0.172571	0.399585	-5.74474
Aldh3b2	-0.455034	-0.133854	-1.06822	0.326205	0.569474	-5.38551
Aldh3b3	-0.0534458	1.27349	-0.184608	0.859573	0.937433	-6.25484
Aldh4a1	-0.823115	4.64247	-3.48278	0.0129379	0.108462	-2.8586
Aldh5a1	0.358731	-1.4562	0.51992	0.6216	0.801507	-5.33581
Aldh6a1	-0.635837	3.77136	-2.92737	0.0261442	0.148501	-3.56374
Aldh9a1	-0.214616	6.88637	-1.01605	0.348529	0.590176	-6.31416
Aldoa	-0.256187	8.50841	-1.77996	0.125009	0.334013	-5.46747
Aldoc	-0.0585867	4.30011	-0.356723	0.733419	0.869974	-6.68002
Alg1	-0.031625	4.6433	-0.183678	0.860272	0.937747	-6.71457
Alg11	0.0119171	4.17428	0.0479742	0.963282	0.989349	-6.67798
Alg12	0.328891	4.22617	1.58633	0.163386	0.386981	-5.48646
Alg13	0.299642	3.4467	1.12553	0.303051	0.546682	-5.74401
Alg14	0.593907	3.39047	2.53036	0.0443651	0.190788	-4.09102
Alg2	-0.235179	5.67269	-1.29655	0.24207	0.481845	-5.99349
Alg3	0.900889	5.00173	4.19397	0.00562834	0.0775986	-2.1148
Alg5	0.299511	6.4772	1.54734	0.172373	0.399425	-5.72186
Alg6	0.0486024	4.41471	0.134106	0.897672	0.956354	-6.61487
Alg8	-0.121217	5.7188	-0.711193	0.503466	0.713717	-6.48907
Alg9	0.321033	2.23809	0.946002	0.380404	0.6153	-5.81186
Alkbh2	0.242357	3.1013	0.861007	0.422062	0.649728	-6.13888
Alkbh3	0.324905	5.26279	2.02131	0.0893781	0.276478	-4.9982
Alkbh3os1	1.18253	-1.73303	1.86111	0.11168	0.314343	-4.24732
Alkbh4	-0.147011	4.2917	-0.813673	0.446686	0.6693	-6.32384
Alkbh5	-0.68109	4.78731	-1.31912	0.234886	0.474489	-5.59353
Alkbh6	-0.0994613	5.21554	-0.534425	0.612119	0.795415	-6.57598
Alkbh7	0.0745915	3.95693	0.287904	0.783035	0.897676	-6.59222
Alkbh8	0.354716	3.92051	1.23844	0.261471	0.503197	-5.85036
Alms1	-0.413401	2.18496	-0.613562	0.561863	0.760445	-5.65766
Alox12	2.90952	-1.47268	2.40003	0.05298	0.208807	-3.66195
Alox15	2.19154	-1.80017	2.47979	0.0475179	0.197675	-3.6308
Alox5	2.19315	3.34581	1.24576	0.258956	0.5008	-5.89814
Alox8	-0.00601163	-2.42782	-0.00461479	0.996466	0.999575	-5.15274
Alpk1	-0.105804	4.52479	-0.400562	0.702514	0.854093	-6.49123
Alpk2	0.779716	2.2856	1.70378	0.138935	0.353998	-4.69036
Alpl	1.77294	1.63158	1.83285	0.116155	0.321282	-4.26274
Als2	-1.20527	5.56053	-5.70605	0.0012209	0.0485661	-0.514643
Als2cl	-1.77537	1.77342	-1.55756	0.169974	0.396233	-4.41253
Alyref2	-0.104354	5.0657	-0.324256	0.75667	0.883529	-6.73019
Amacr	-1.74144	1.49746	-2.83985	0.0293267	0.15566	-3.19517
Ambra1	-1.53421	5.90857	-7.95277	0.000202358	0.0325152	1.38397
Amd1	0.358739	6.13492	2.25381	0.0647661	0.232047	-4.68174
Amd2	0.335725	5.84791	2.04968	0.0859231	0.271208	-4.93538
Amdhd1	0.630786	0.990697	1.82689	0.11712	0.322415	-4.78494
Amdhd2	-0.522149	5.25184	-2.38081	0.0543926	0.211288	-4.44887
Amer1	1.13389	3.54888	4.47863	0.00412088	0.0715474	-1.62114
Amfr	0.236881	4.71405	0.777817	0.466015	0.684058	-6.42577
Amigo1	0.96933	0.221132	1.782	0.124656	0.333715	-4.48627
Amigo3	-0.193214	2.3024	-0.691188	0.515096	0.723939	-6.0072
Ammecr1	-0.275409	0.798975	-0.526634	0.617202	0.798253	-5.63181
Ammecr1l	-0.0134609	5.8003	-0.0746281	0.942919	0.977948	-6.81283
Amn	0.158331	-3.4796	0.0987115	0.924559	0.969065	-5.14063
Amn1	0.544578	3.57859	2.02863	0.0884729	0.274967	-4.76883
Amot	0.527169	1.23502	1.1115	0.308588	0.551941	-5.41891
Amotl1	-1.64057	-2.06932	-1.08778	0.318144	0.560943	-4.77479
Ampd2	-0.83547	5.73313	-2.62861	0.0388542	0.177464	-4.10642
Ampd3	-1.10664	5.21971	-3.09425	0.0210627	0.134539	-3.33624
Amph	0.598935	0.00419548	0.460009	0.661589	0.828714	-5.93425
Amz1	-0.958818	5.27989	-3.41953	0.0139843	0.112548	-2.79519
Amz2	0.0605482	5.05592	0.363172	0.728837	0.867691	-6.73694
Anapc1	-0.313044	6.69326	-0.877451	0.413746	0.643588	-6.43884
Anapc10	0.282513	5.23282	1.21057	0.27125	0.512949	-6.04327
Anapc11	-0.26446	6.93568	-1.12514	0.303204	0.546721	-6.20622
Anapc13	0.393888	5.8789	1.07999	0.321333	0.565201	-6.2113
Anapc15	0.558445	5.10569	2.31747	0.0593314	0.221996	-4.52515
Anapc16	-0.0254337	5.33035	-0.142832	0.891065	0.953034	-6.77486
Anapc2	0.298699	6.09286	0.661651	0.532587	0.73876	-6.55409
Anapc5	0.0322786	8.75119	0.17102	0.869788	0.942085	-6.93311
Anapc7	-0.490059	5.12369	-2.81226	0.0304148	0.158404	-3.8655
Ang	2.44058	-1.10399	7.28702	0.000328564	0.0331559	0.757806
Ang2	-0.435163	-0.979694	-1.22085	0.267608	0.509643	-5.33263
Angel1	-0.82613	3.87372	-3.56258	0.0117387	0.104118	-2.75945
Angel2	0.00494741	6.64243	0.0315679	0.975833	0.995741	-6.85574
Angpt1	1.40068	1.48836	3.61132	0.0110669	0.101893	-2.48967
Angpt4	-0.650736	-1.59073	-0.77641	0.466786	0.684894	-5.59382
Angptl2	-6.33322	-0.849592	-6.22985	0.000768367	0.0401665	-1.60083
Angptl3	0.24834	-1.4417	0.468266	0.656	0.82589	-5.6918
Angptl4	0.301098	0.915128	0.232817	0.823585	0.918788	-5.68453
Angptl6	0.672397	1.12924	2.31963	0.0591552	0.221471	-4.13093
Angptl7	-0.33847	0.626378	-1.55611	0.170312	0.396649	-5.671
Ank	0.879009	3.05588	1.2578	0.254861	0.496558	-5.39015
Ank1	-2.17928	1.37548	-1.49527	0.185102	0.414601	-4.75544
Ank3	1.56121	-2.29167	2.764	0.0324231	0.164045	-3.27552
Ankdd1b	-1.42388	0.0756339	-2.34715	0.056961	0.217108	-3.72242
Ankfy1	-0.735925	7.00046	-2.67049	0.0367308	0.173008	-4.15047
Ankib1	0.436142	5.00575	1.74997	0.13032	0.341872	-5.42044
Ankle1	1.54294	2.90824	1.74848	0.13059	0.342436	-4.67511
Ankle2	0.10952	6.48145	0.308492	0.768061	0.889823	-6.80424
Ankmy1	-1.73175	-1.66734	-2.56934	0.0420853	0.185454	-3.48356
Ankmy2	-0.267193	5.3988	-1.48081	0.188791	0.419456	-5.72568
Ankra2	0.315928	3.76338	0.676059	0.524008	0.732289	-6.29388
Ankrd10	0.572604	6.55386	2.76764	0.0322669	0.163722	-4.04003
Ankrd11	0.973347	5.93295	3.33884	0.015457	0.118113	-3.23714
Ankrd12	0.238113	6.73794	0.580792	0.582367	0.773907	-6.69298
Ankrd13a	0.67562	5.82269	3.85294	0.00830833	0.0894602	-2.56009
Ankrd13c	-0.412826	3.97255	-0.673866	0.525308	0.733202	-6.10683
Ankrd13d	-1.25396	3.06641	-4.79698	0.00294846	0.063533	-1.20371
Ankrd16	-0.0762124	4.31345	-0.264391	0.800261	0.90596	-6.59088
Ankrd17	0.296077	5.5516	0.997983	0.356539	0.596891	-6.27847
Ankrd2	-0.426483	-2.41874	-0.168142	0.871956	0.94279	-5.15526
Ankrd23	-1.11858	2.71158	-2.18471	0.0712535	0.244424	-4.33467
Ankrd24	-1.51574	0.90408	-2.7382	0.033555	0.166539	-3.32355
Ankrd26	0.522053	3.89542	2.41923	0.0516078	0.20589	-4.31515
Ankrd27	0.0486014	6.95465	0.204137	0.844945	0.930324	-6.87641
Ankrd28	0.666466	3.61955	2.80677	0.0306365	0.158933	-3.88329
Ankrd33b	1.77866	3.97293	3.64636	0.0106104	0.100138	-2.40185
Ankrd34c	1.18937	-3.30291	0.806344	0.450589	0.671924	-4.88188
Ankrd35	3.78126	1.9431	4.25882	0.00523696	0.0757022	-1.91481
Ankrd36	0.710563	-2.73509	0.462179	0.660118	0.827689	-5.30074
Ankrd37	1.684	1.42421	3.56862	0.011653	0.104118	-2.47043
Ankrd40	-0.00787495	3.63418	-0.0296165	0.977326	0.99668	-6.56835
Ankrd44	0.0480628	7.00655	0.170605	0.870101	0.942156	-6.8546
Ankrd46	-0.018669	5.11451	-0.114275	0.91272	0.962755	-6.77597
Ankrd49	-0.22705	5.72572	-0.662279	0.532211	0.738652	-6.55676
Ankrd50	0.00754497	2.90021	0.0262663	0.97989	0.997998	-6.30274
Ankrd52	-2.23001	3.61334	-2.60843	0.0399235	0.179591	-3.6117
Ankrd54	0.600523	4.38693	1.02497	0.344628	0.586157	-5.9772
Ankrd55	-0.10488	0.875553	-0.122833	0.906221	0.959978	-5.75605
Ankrd6	-2.63848	-1.21967	-2.38189	0.0543122	0.211229	-3.72088
Ankrd61	-1.42824	-2.68802	-0.855661	0.424792	0.651761	-4.92114
Ankrd9	-0.311327	3.03825	-0.570598	0.588835	0.778195	-6.18055
Anks1	-3.22576	2.96815	-5.20064	0.00196748	0.0557532	-0.972702
Anks3	0.349089	5.88332	1.30113	0.240596	0.480071	-6.0092
Anks6	0.811368	-0.768612	1.44753	0.197539	0.428992	-4.96714
Ankzf1	-0.572326	4.70845	-2.26534	0.0637451	0.230587	-4.54399
Anln	0.0889851	3.61408	0.0910435	0.9304	0.972886	-6.15307
Ano1	0.439563	-1.7439	0.23939	0.818712	0.916624	-5.60883
Ano10	-0.576993	4.45609	-2.43049	0.0508206	0.204187	-4.27595
Ano2	3.16384	-3.26528	4.8455	0.00280525	0.063417	-1.53974
Ano6	-0.712858	6.57771	-3.29188	0.0163918	0.121558	-3.27103
Ano7	-0.871498	-2.20242	-0.613271	0.562044	0.760607	-5.03703
Anp32a	-0.471951	7.12615	-3.03249	0.0228062	0.139973	-3.67996
Anp32b	0.185899	5.40851	0.418905	0.68976	0.847623	-6.55791
Anp32e	-0.470557	8.61348	-2.5638	0.0424017	0.186282	-4.37152
Anpep	-2.35223	5.19481	-1.86461	0.111137	0.313482	-4.24618
Antxr1	-1.12178	-0.991041	-0.899297	0.402889	0.635679	-4.88864
Anxa11	-1.72512	6.3842	-8.70224	0.000121994	0.0325152	1.87783
Anxa2	0.668281	8.13585	1.80908	0.120055	0.327473	-5.4137
Anxa3	-0.8659	4.10086	-1.42964	0.202396	0.435111	-4.80338
Anxa4	-0.306279	6.88954	-1.47373	0.190622	0.421412	-5.78362
Anxa5	-0.416846	7.53301	-2.18881	0.0708498	0.244166	-4.86156
Anxa6	0.0419871	8.88563	0.260425	0.803179	0.90782	-6.87615
Anxa7	-0.635708	7.06906	-3.20123	0.0183765	0.126562	-3.44402
Anxa9	-0.563355	1.14141	-1.85712	0.112301	0.31519	-4.65844
Aoah	1.52464	0.468113	2.90688	0.0268543	0.150062	-3.20785
Aoc2	-0.0229235	-1.22022	-0.0278158	0.978704	0.997266	-5.37558
Aox2	-0.284796	-0.341415	-0.668666	0.528399	0.735609	-6.01791
Aox3	1.18937	-2.9147	0.888353	0.408301	0.638484	-4.83732
Ap1ar	0.308446	2.77995	1.14365	0.296021	0.539409	-5.68457
Ap1b1	-1.47218	7.41513	-7.64888	0.000251363	0.0331559	1.14207
Ap1g1	-0.250171	5.81676	-1.49479	0.185226	0.414796	-5.7074
Ap1g2	-0.373266	6.33092	-1.60723	0.158754	0.380885	-5.5848
Ap1m1	-0.336303	7.28688	-1.93717	0.10047	0.295974	-5.2059
Ap1m2	-0.977933	2.0842	-3.44875	0.0134897	0.110655	-2.86736
Ap1s1	0.0219441	6.2485	0.105461	0.919422	0.96662	-6.85523
Ap1s2	0.421169	4.34247	1.7542	0.129557	0.340339	-5.04528
Ap1s3	-1.17088	3.89868	-3.02907	0.0229071	0.139983	-3.14732
Ap2a1	-2.54381	5.25719	-6.61483	0.000556975	0.0374516	0.401229
Ap2a2	-0.939772	6.05882	-4.09146	0.00631558	0.0795825	-2.20913
Ap2b1	-0.738707	7.11592	-4.14004	0.00597884	0.0786416	-2.2335
Ap2m1	-0.29514	8.74113	-1.9157	0.103515	0.301751	-5.28294
Ap2s1	0.0831309	6.65906	0.497724	0.636261	0.811994	-6.72063
Ap3b1	-0.486076	7.25414	-2.87475	0.0280101	0.152806	-3.89175
Ap3d1	-0.340608	7.26058	-2.19451	0.0702935	0.243012	-4.84398
Ap3m1	0.14014	7.26477	0.937266	0.384535	0.618493	-6.43095
Ap3m2	-0.0877468	5.01521	-0.422311	0.687404	0.846083	-6.70151
Ap3s1	-2.11673	1.72944	-1.7479	0.130695	0.342638	-4.38091
Ap3s2	0.0307779	6.00032	0.158536	0.879197	0.946011	-6.82354
Ap4b1	-0.180742	4.96813	-0.929957	0.388018	0.622021	-6.21374
Ap4e1	-0.598952	4.50531	-2.02351	0.0891045	0.276262	-4.8168
Ap4m1	-1.50571	2.74397	-3.90956	0.00777858	0.0869149	-2.07825
Ap4s1	0.0937464	4.63373	0.190683	0.855016	0.935685	-6.62417
Ap5b1	-3.56913	4.4703	-8.09864	0.000182806	0.0325152	1.07923
Ap5m1	0.37696	5.77647	2.32095	0.0590477	0.221202	-4.63519
Ap5s1	-0.277648	4.0916	-1.17283	0.284992	0.5276	-5.91127
Ap5z1	-0.996624	5.05116	-3.06946	0.0217446	0.137126	-3.4282
Apaf1	-0.413779	5.83501	-1.46465	0.192994	0.424371	-5.66788
Apba1	0.155256	3.02541	0.621776	0.556793	0.756202	-6.33998
Apba3	-0.815066	4.19104	-3.72022	0.00971462	0.0963774	-2.52964
Apbb1	1.60808	1.30383	4.00565	0.00696354	0.0830458	-1.9626
Apbb1ip	-0.636236	7.21532	-2.60024	0.0403667	0.180955	-4.26435
Apbb2	0.968173	0.841062	2.94044	0.0257017	0.147126	-3.40335
Apbb3	-0.586682	3.94947	-1.83094	0.116462	0.321783	-5.0304
Apc	0.523256	5.11985	1.57922	0.164991	0.389296	-5.65627
Apc2	-0.690533	-1.26763	-0.6741	0.525169	0.733202	-5.24499
Apcdd1	-0.327866	-2.48692	-0.519326	0.62199	0.801507	-5.40858
Apeh	-0.424029	6.35433	-2.74623	0.0331982	0.165977	-4.04206
Apex1	0.235152	4.63732	1.00956	0.351391	0.592381	-6.11138
Apex2	0.906511	3.3947	2.97154	0.0246813	0.144695	-3.45911
Aph1b	-0.0659639	4.81742	-0.272475	0.794324	0.90369	-6.55327
Aph1c	-0.146135	5.77839	-0.594955	0.573452	0.768089	-6.53107
Api5	0.0716962	8.39117	0.380863	0.716329	0.861469	-6.83684
Apip	0.526051	5.36487	2.19985	0.0697772	0.242167	-4.75479
Aplf	0.538451	3.45335	1.80245	0.121164	0.328765	-4.99815
Apln	-2.21727	-1.64029	-1.47551	0.19016	0.420732	-4.48368
Aplnr	0.853648	-2.22216	0.543459	0.606256	0.791609	-5.27799
Aplp2	-0.0167741	7.08371	-0.0457777	0.964962	0.990419	-6.85509
Apmap	0.154418	5.56877	0.81761	0.444599	0.668272	-6.46317
Apoa2	-1.18018	-2.71278	-0.731376	0.491912	0.704329	-4.98732
Apobec1	-0.389702	6.41115	-1.47288	0.190842	0.421738	-5.76784
Apobec3	0.182134	9.02002	0.59046	0.576272	0.770218	-6.76444
Apobr	-0.808105	5.03421	-2.63144	0.0387067	0.177464	-3.65007
Apoc2	1.18937	-2.87595	0.561961	0.594348	0.782647	-4.99452
Apod	0.387238	0.578275	0.817005	0.444919	0.668355	-6.23739
Apoe	0.84756	7.87749	1.96781	0.0962783	0.289465	-5.18004
Apol10b	1.40226	2.85029	0.429659	0.682335	0.842465	-5.5386
Apol7a	-0.090639	2.78257	-0.0261801	0.979956	0.997998	-5.42551
Apol7c	-0.416738	6.63416	-0.196598	0.850584	0.933387	-6.03768
Apol7e	-0.887151	2.77409	-0.260597	0.803052	0.90782	-5.47752
Apol9b	0.439562	-3.2982	0.24195	0.816817	0.9156	-5.11329
Apoo	0.111584	4.39048	0.423323	0.686706	0.845769	-6.55167
Apool	0.968476	4.90981	3.35891	0.0150753	0.1165	-3.14772
Apopt1	0.117739	4.41904	0.420293	0.6888	0.847194	-6.57713
App	1.46196	4.9127	3.53358	0.0121597	0.105942	-2.75635
Appl1	-0.0565715	6.26901	-0.349147	0.738818	0.873749	-6.77184
Appl2	-0.36946	4.49705	-1.78818	0.123591	0.33273	-5.15974
Aprt	0.0361323	5.29895	0.20365	0.845309	0.930559	-6.72088
Aptx	0.739068	5.36071	4.42997	0.00434277	0.0721098	-1.86196
Aqp1	2.06723	1.30327	1.89813	0.106076	0.305525	-4.65837
Aqp3	0.378479	0.00673129	0.288668	0.782477	0.897452	-5.9346
Aqp8	2.42314	-1.22968	3.51994	0.0123634	0.106554	-2.4681
Aqp9	1.35197	3.16488	1.07496	0.323407	0.566463	-5.96217
Aqr	-0.991484	6.2177	-3.81532	0.00868253	0.0916317	-2.55934
Ar	3.09447	-2.44428	3.70569	0.00988402	0.0968961	-2.31895
Araf	-0.0372059	6.85842	-0.215413	0.836529	0.926187	-6.8628
Arap1	-1.87844	6.98414	-7.54644	0.000270868	0.0331559	1.05973
Arap2	0.285062	5.07951	0.69365	0.513655	0.722541	-6.26064
Arap3	-0.916239	1.52423	-0.419488	0.689357	0.847342	-5.60936
Arc	-3.69603	2.57399	-1.2675	0.251607	0.493784	-4.66754
Arel1	-0.629414	5.77595	-3.0147	0.023337	0.141562	-3.60613
Arf1	-0.317473	9.24454	-2.13875	0.0759346	0.253136	-4.98996
Arf2	0.395751	5.83164	2.19251	0.0704889	0.243416	-4.77817
Arf5	0.334472	5.50128	0.465855	0.65763	0.826516	-6.55171
Arfgap1	-0.790325	5.984	-4.8111	0.00290595	0.063533	-1.42152
Arfgap3	-0.459198	5.16042	-1.73863	0.132387	0.344801	-5.37452
Arfgef1	0.650498	5.52701	2.38815	0.0538483	0.210492	-4.49781
Arfgef2	-0.410986	4.41701	-1.45935	0.194391	0.425829	-5.6297
Arfip1	0.507394	5.83046	2.67121	0.0366954	0.172969	-4.13639
Arfip2	0.0972975	5.35907	0.441889	0.673937	0.837009	-6.66413
Arfrp1	-0.00875136	5.72608	-0.0508519	0.961082	0.988153	-6.81374
Arg1	0.445859	-2.08844	0.418651	0.689936	0.847634	-5.35362
Arg2	0.130397	-0.196261	0.157067	0.880306	0.946585	-5.49939
Arglu1	-0.701199	4.59495	-3.0247	0.0230371	0.140291	-3.44139
Arhgap1	-0.205072	7.55568	-0.890483	0.407243	0.638088	-6.44732
Arhgap10	0.735831	0.381705	1.16635	0.287412	0.529621	-5.29077
Arhgap11a	-0.470103	6.30693	-1.98474	0.0940381	0.28473	-5.05626
Arhgap12	-0.261682	5.32657	-1.52182	0.178506	0.406357	-5.68292
Arhgap15	0.516146	7.61102	2.59383	0.0407172	0.181647	-4.31402
Arhgap17	-0.702273	7.07748	-2.87582	0.027971	0.152727	-3.90671
Arhgap18	-0.0394456	6.35154	-0.203976	0.845065	0.930374	-6.74078
Arhgap19	-0.638412	4.77422	-1.33968	0.228506	0.467097	-5.63813
Arhgap21	0.564062	4.29106	2.79589	0.0310808	0.160259	-3.84227
Arhgap22	-2.88217	2.48949	-1.2643	0.252677	0.494633	-4.66089
Arhgap23	3.80395	-1.77438	2.89971	0.0271076	0.150596	-3.15519
Arhgap24	0.529056	2.06701	1.30181	0.24038	0.479888	-5.89345
Arhgap25	-0.151311	6.89537	-1.02429	0.344923	0.586336	-6.32463
Arhgap26	-0.00770347	5.03494	-0.0166695	0.987237	0.999575	-6.48443
Arhgap27	-1.8413	6.47518	-7.05156	0.000393448	0.0334538	0.686985
Arhgap28	-3.37069	2.62738	-2.09656	0.0805098	0.260872	-3.95611
Arhgap29	0.285061	1.8341	1.34651	0.226422	0.465407	-5.71317
Arhgap30	-1.51014	8.62745	-7.2641	0.000334308	0.0331559	0.822734
Arhgap31	-2.29655	3.22539	-3.2298	0.0177239	0.1249	-2.79247
Arhgap32	-0.938798	2.96803	-2.90437	0.0269429	0.150219	-3.611
Arhgap33	-3.3422	1.19839	-2.36912	0.0552701	0.213295	-3.68493
Arhgap35	-0.397044	2.55712	-1.15965	0.289931	0.532061	-5.51217
Arhgap39	0.171188	2.3902	0.291758	0.780224	0.896359	-5.94614
Arhgap4	-0.94316	5.7762	-4.05234	0.00660223	0.0808089	-2.26256
Arhgap45	-1.62986	8.59528	-5.31969	0.00175332	0.0542656	-0.941788
Arhgap5	0.464676	6.53225	0.987171	0.361403	0.601096	-6.36073
Arhgap6	-0.0630832	5.68067	-0.296708	0.776619	0.894583	-6.75435
Arhgap8	1.18937	-1.11885	0.534651	0.611973	0.795308	-5.005
Arhgap9	0.765367	6.44434	1.07985	0.321393	0.565227	-6.1963
Arhgdia	-0.946778	10.0831	-5.0571	0.00226624	0.0582123	-1.25652
Arhgdib	-0.00626228	9.85477	-0.0399958	0.969385	0.992741	-6.97257
Arhgef1	0.212249	5.55956	0.274486	0.792849	0.902925	-6.64545
Arhgef10	-0.130786	5.83318	-0.776022	0.466999	0.685016	-6.57308
Arhgef10l	-1.04479	2.32954	-3.11288	0.0205659	0.13292	-3.43277
Arhgef11	1.34608	1.27401	4.21782	0.00548069	0.0768121	-1.75549
Arhgef12	0.411061	4.30305	1.71322	0.13713	0.351055	-5.31444
Arhgef15	-2.52308	-1.67077	-1.1855	0.280314	0.522683	-4.71685
Arhgef16	1.8587	-1.50867	0.996434	0.357233	0.597603	-5.10845
Arhgef17	-1.02502	-2.29879	-0.616268	0.56019	0.759326	-5.04125
Arhgef18	-1.19996	2.17771	-2.33821	0.0576643	0.218459	-3.93111
Arhgef2	-1.80845	7.40928	-6.32242	0.000710184	0.0395251	0.0885305
Arhgef25	2.172	-0.0999695	0.953707	0.37679	0.612503	-5.16122
Arhgef26	1.09028	-1.37658	1.02711	0.343696	0.585666	-5.02819
Arhgef28	4.76526	-1.85213	4.20881	0.00553597	0.0771122	-2.23343
Arhgef3	0.155337	5.67145	1.00311	0.354252	0.594378	-6.2829
Arhgef4	-0.205191	2.49524	-0.748434	0.482288	0.697306	-6.02568
Arhgef40	-2.40748	1.88121	-1.7702	0.126713	0.336249	-4.2375
Arhgef5	0.693558	-1.43617	1.37262	0.21861	0.454352	-5.00806
Arhgef6	0.0374931	8.16188	0.204574	0.844618	0.930212	-6.91709
Arhgef7	-1.04176	6.258	-4.67439	0.00334849	0.0659652	-1.55449
Arhgef9	1.19128	1.1655	2.15083	0.0746738	0.250684	-4.11533
Arid1a	0.0193888	6.51561	0.0535589	0.959013	0.986842	-6.85685
Arid1b	-0.0334514	5.68197	-0.143491	0.890565	0.952746	-6.81425
Arid2	1.02181	5.09982	4.9619	0.00249271	0.0606318	-1.21733
Arid3a	-0.447947	4.43527	-2.14935	0.0748276	0.25107	-4.80602
Arid3b	-0.156185	5.06169	-0.538523	0.609456	0.793616	-6.59422
Arid4a	0.156951	6.78311	0.839962	0.432884	0.65864	-6.46775
Arid4b	-0.250683	7.00069	-0.956594	0.375443	0.61174	-6.39029
Arid5a	-0.634421	6.31389	-3.36818	0.0149027	0.115976	-3.23153
Arid5b	0.778931	4.28187	4.28988	0.00506038	0.0748978	-1.94974
Arih1	0.378054	4.70054	1.72084	0.13569	0.348726	-5.33038
Arih2	-0.308968	6.60434	-1.71649	0.13651	0.35013	-5.46521
Arl1	0.0498236	6.26171	0.298397	0.77539	0.894448	-6.79609
Arl10	0.826771	2.94859	1.50284	0.1832	0.412575	-5.17511
Arl11	0.241949	3.9815	1.12854	0.301875	0.545431	-6.02718
Arl13b	0.901565	3.79267	4.49563	0.00404639	0.0712798	-1.6726
Arl14ep	0.0508557	5.3732	0.303512	0.771673	0.892317	-6.74071
Arl15	-0.0507438	1.16071	-0.0841028	0.93569	0.975051	-5.95753
Arl2	-0.292147	4.63219	-1.43284	0.201519	0.433984	-5.67194
Arl2bp	-0.0512133	3.02029	-0.119918	0.908434	0.961174	-6.35632
Arl3	0.736152	5.15884	3.60492	0.0111527	0.102379	-2.84348
Arl4a	0.424454	5.43567	1.05398	0.332178	0.575068	-6.23412
Arl4c	0.416069	3.82186	0.765823	0.472611	0.690052	-5.74995
Arl4d	1.44391	1.10045	2.34551	0.0570897	0.21721	-4.00859
Arl5a	0.708056	4.92278	2.19285	0.0704556	0.243369	-4.70383
Arl5b	0.093317	4.3716	0.378364	0.71809	0.862435	-6.53895
Arl5c	-0.0992692	6.90892	-0.351125	0.737407	0.872695	-6.80827
Arl6	0.208171	4.68627	0.473841	0.65224	0.823572	-6.50717
Arl6ip1	0.357706	8.60873	2.55515	0.0429008	0.187084	-4.3924
Arl6ip4	0.153781	6.56014	1.0145	0.349208	0.590707	-6.32849
Arl6ip5	-0.0340734	8.59395	-0.249996	0.810869	0.912488	-6.90544
Arl6ip6	-0.218167	5.80756	-1.33467	0.230047	0.468376	-5.86456
Arl8a	0.407421	2.74455	1.08136	0.320773	0.564651	-5.70448
Armc1	0.605691	5.49323	3.70814	0.00985518	0.0968436	-2.7252
Armc10	0.42357	5.57913	2.63012	0.0387756	0.177464	-4.18817
Armc3	0.547761	0.755727	1.37174	0.218869	0.454701	-5.56531
Armc5	-1.83313	5.26867	-6.17007	0.00080884	0.040369	0.0344732
Armc6	-0.0541272	3.25828	-0.2233	0.830656	0.922943	-6.37379
Armc7	0.180065	4.89172	0.660884	0.533046	0.738864	-6.4542
Armc8	0.216077	6.27143	0.722418	0.497018	0.708941	-6.52414
Armc9	0.024456	3.08663	0.0937723	0.92832	0.971454	-6.42471
Armcx1	-2.30853	-0.954186	-1.25869	0.254562	0.496287	-4.65704
Armcx2	-0.312001	5.4966	-1.88255	0.1084	0.309048	-5.22337
Armcx3	0.373883	5.48922	2.28223	0.0622791	0.228013	-4.69434
Armcx4	2.06445	-2.4398	1.34179	0.22786	0.466698	-4.60802
Armcx5	-0.138875	3.47078	-0.529061	0.615616	0.79747	-6.33532
Armcx6	0.0831231	2.57252	0.357912	0.732573	0.869462	-6.416
Armh3	-0.89105	4.74095	-3.22682	0.0177909	0.124959	-3.13553
Armt1	0.527951	4.75233	2.74685	0.0331711	0.165977	-3.90579
Arnt	-0.348507	5.44842	-1.4847	0.187794	0.418421	-5.66774
Arntl	0.366517	3.9366	1.27668	0.248556	0.489967	-5.71511
Arntl2	2.77233	-2.48751	3.79681	0.00887345	0.0923896	-2.23997
Arpc1a	0.110976	6.5406	0.747812	0.482636	0.697566	-6.55633
Arpc2	0.118035	10.1844	0.751219	0.480729	0.696188	-6.64629
Arpc3	-0.00676138	9.01375	-0.0297943	0.97719	0.996623	-6.94334
Arpc4	-0.00402614	8.85989	-0.0286343	0.978078	0.997119	-6.93599
Arpc5	0.377566	9.8831	2.7015	0.035238	0.170454	-4.21212
Arpc5l	0.296448	7.75181	1.64684	0.150314	0.369196	-5.62611
Arpin	-2.74993	2.46314	-1.01376	0.349533	0.590976	-4.84628
Arpp19	0.306163	7.49884	1.62458	0.155003	0.375438	-5.64017
Arpp21	0.46107	0.725522	0.518152	0.622761	0.801893	-6.20791
Arrb1	-0.446536	4.3028	-0.843549	0.431025	0.657181	-5.81072
Arrb2	0.0701627	6.35738	0.368971	0.724726	0.865882	-6.73079
Arrdc1	-0.262364	7.0053	-1.10374	0.311687	0.555478	-6.23368
Arrdc2	0.257634	3.93826	0.602526	0.568719	0.764928	-6.15199
Arrdc3	-0.463007	5.20318	-2.31498	0.0595346	0.222272	-4.6031
Arrdc4	0.356693	4.82352	0.371217	0.723137	0.86488	-6.46085
Arsa	-1.49254	4.16816	-6.2639	0.000746355	0.0398118	0.11806
Arsb	-0.511509	6.167	-2.89091	0.0274224	0.151599	-3.75236
Arsg	0.158331	-2.59778	0.0895587	0.931531	0.973365	-5.1413
Arsi	1.18937	-2.20997	0.755597	0.478285	0.69435	-4.90787
Arsk	0.704472	4.2505	3.64768	0.0105935	0.100134	-2.71245
Art2b	-1.73015	-0.0813586	-1.09043	0.317065	0.559863	-4.77459
Art3	2.1442	0.0755089	1.99167	0.0931364	0.28304	-4.07807
Art4	1.57568	0.0661046	1.64402	0.150901	0.370272	-4.78935
Arv1	-0.00266756	2.96907	-0.0119043	0.990885	0.999575	-6.52262
Arvcf	-1.08918	1.46826	-1.76233	0.128105	0.33828	-4.6483
Arxes1	-0.00601163	-2.24839	-0.00519284	0.996024	0.999575	-5.15274
Arxes2	-1.8129	-0.625917	-1.25227	0.256736	0.49916	-4.65642
As3mt	-0.0510293	5.58545	-0.237045	0.82045	0.917433	-6.81873
Asah1	0.00055637	9.3514	0.00265264	0.997969	0.999575	-6.96452
Asah2	-0.772984	2.19695	-2.4404	0.0501373	0.203539	-3.97191
Asap1	0.0537815	5.15391	0.101659	0.922315	0.967577	-6.24435
Asap2	-0.915768	1.70099	-0.776057	0.466979	0.685016	-5.26724
Asap3	-1.43045	-1.10924	-1.43021	0.202239	0.434932	-4.51221
Asb1	-0.877212	2.10397	-1.77517	0.125842	0.335156	-4.67011
Asb14	1.78141	-2.66931	2.39196	0.0535683	0.210236	-3.6609
Asb2	-2.28833	6.16681	-2.26089	0.0641372	0.231081	-3.86218
Asb3	0.212912	5.13157	0.977183	0.365943	0.604819	-6.25379
Asb5	-0.268133	-1.98608	-0.467423	0.65657	0.82602	-5.67078
Asb6	-0.717648	4.96755	-3.34409	0.0153561	0.117699	-3.08553
Asb7	-0.829847	4.27636	-4.11537	0.00614724	0.079307	-2.04387
Asb8	0.1412	5.82611	0.680987	0.521094	0.72941	-6.58219
Ascc1	0.339485	5.53719	2.03731	0.0874121	0.273459	-4.99068
Ascc2	-0.755933	5.45684	-4.10509	0.00621905	0.079469	-2.17005
Ascc3	-0.263543	5.56122	-1.34544	0.226748	0.465651	-5.86437
Asf1a	0.539498	3.742	0.848603	0.428416	0.654731	-6.04215
Asf1b	1.01532	6.06482	2.57673	0.0416674	0.184362	-4.14979
Ash1l	0.212015	6.96777	0.692353	0.514414	0.723444	-6.62317
Ash2l	-0.249731	3.12336	-0.55015	0.601934	0.788039	-6.14221
Asic1	-1.35744	0.0807451	-2.03516	0.0876739	0.273587	-4.04563
Asl	0.155909	6.14399	0.834647	0.435649	0.660902	-6.45319
Asna1	-0.38503	6.13065	-1.68808	0.141987	0.358583	-5.48742
Asns	1.19764	5.1969	0.954946	0.376212	0.612079	-6.3643
Asnsd1	-0.11692	6.68104	-0.482399	0.646491	0.819654	-6.7163
Asph	0.335423	6.02514	1.19913	0.275354	0.517398	-6.15834
Aspm	0.716854	4.23617	1.41421	0.206671	0.440266	-5.40231
Asprv1	-1.67498	1.9701	-0.320922	0.759073	0.885313	-5.16777
Aspscr1	-0.18358	6.27766	-0.649973	0.539606	0.743485	-6.59136
Ass1	-0.369418	7.04599	-1.26681	0.251835	0.49392	-6.04288
Aste1	-0.451351	3.65022	-1.96113	0.0971769	0.290906	-4.79638
Asxl1	0.358398	4.69359	1.28128	0.247041	0.4882	-5.84442
Asxl2	0.303438	6.13187	0.882475	0.41123	0.641339	-6.42835
Atad1	-0.0638044	6.8225	-0.341076	0.744588	0.876916	-6.81658
Atad2	0.683965	6.07922	1.64289	0.151136	0.370571	-5.46651
Atad2b	-0.0375225	4.25803	-0.125106	0.904496	0.959303	-6.60271
Atad3a	0.08092	4.10932	0.093536	0.928501	0.971481	-6.37098
Atad3aos	-0.407324	-0.699119	-0.736694	0.488897	0.701879	-5.53843
Atad5	-1.18956	4.75598	-2.88842	0.0275119	0.151688	-3.4415
Atat1	-1.8098	2.64923	-2.51603	0.0452356	0.193001	-3.68401
Atcay	-0.17622	-1.57254	-0.122636	0.906371	0.960037	-5.15191
Ate1	-0.181809	5.99273	-1.10557	0.310956	0.554414	-6.18265
Atf1	0.0539276	5.03493	0.181138	0.86218	0.938641	-6.65894
Atf2	0.573081	5.86286	2.49872	0.0463111	0.195253	-4.3904
Atf3	0.616843	4.27215	0.266143	0.798973	0.905413	-5.81324
Atf4	0.360963	5.47714	1.8284	0.116875	0.322126	-5.28037
Atf5	0.123673	1.48723	0.138131	0.894622	0.9547	-5.87224
Atf6	-0.549632	7.19727	-2.42199	0.0514132	0.205657	-4.52504
Atf6b	-1.77291	7.57069	-11.1282	2.98006e-05	0.0325152	3.24752
Atf7	0.751379	4.40521	2.89588	0.0272441	0.151084	-3.74468
Atf7ip	-0.137572	8.18507	-0.782916	0.463231	0.682081	-6.59081
Atf7ip2	1.18937	-1.94171	0.70632	0.506283	0.715918	-4.93186
Atg10	-0.332436	4.52195	-1.33075	0.231259	0.469901	-5.79462
Atg101	0.558784	5.99816	2.53935	0.0438278	0.189199	-4.33319
Atg12	0.252221	5.89915	1.65535	0.148558	0.366881	-5.5438
Atg13	-0.582003	5.54045	-3.59935	0.0112279	0.102684	-2.84631
Atg14	-0.524597	4.98474	-2.51442	0.0453345	0.193283	-4.24393
Atg16l1	0.541134	5.39927	2.65192	0.0376566	0.17504	-4.11144
Atg16l2	-1.09226	4.57728	-3.43947	0.0136448	0.111265	-2.85475
Atg2a	-2.70412	5.05315	-8.93829	0.000104837	0.0325152	1.86731
Atg2b	-0.442215	4.28453	-1.31234	0.237023	0.476696	-5.63595
Atg3	0.377917	6.94644	1.30585	0.239086	0.478365	-6.02081
Atg4a	0.968367	4.97361	5.58841	0.00136054	0.0504049	-0.599194
Atg4b	0.194231	6.12747	1.27398	0.249451	0.491029	-6.02465
Atg4c	0.22867	4.95628	0.835234	0.435343	0.660599	-6.29672
Atg4d	-0.165736	5.07259	-0.909671	0.397809	0.630783	-6.33591
Atg5	0.422179	5.94006	1.80623	0.12053	0.328047	-5.36227
Atg7	-0.119645	5.55493	-0.580588	0.582496	0.773907	-6.59651
Atg9a	-3.0999	4.25071	-5.40609	0.00161444	0.0533594	-0.61142
Atg9b	0.469392	1.43562	0.58042	0.582603	0.773907	-5.31634
Atic	-0.0304384	6.16095	-0.166368	0.873292	0.942855	-6.81765
Atl2	0.376153	5.12508	1.25451	0.255975	0.498104	-6.00077
Atl3	0.762858	6.14789	4.18815	0.00566503	0.0775986	-2.15863
Atm	0.263743	4.89683	0.944366	0.381176	0.615757	-6.31161
Atmin	-0.187951	3.69106	-0.417879	0.690471	0.847969	-6.21176
Atn1	-0.670547	3.79748	-1.94821	0.0989388	0.293623	-4.8332
Atox1	0.267135	8.04839	1.00034	0.355486	0.595885	-6.33462
Atp10a	0.69623	1.22273	1.65168	0.149312	0.367463	-4.81849
Atp10d	-1.00871	4.71324	-2.69524	0.0355343	0.17087	-3.7447
Atp11a	0.656082	3.09261	1.18911	0.278994	0.521397	-5.42788
Atp11b	0.664771	6.09319	2.31285	0.0597087	0.222736	-4.64476
Atp11c	-0.146353	4.3943	-0.655486	0.536285	0.741068	-6.29563
Atp13a1	-0.518797	6.79031	-2.04601	0.0863627	0.271936	-5.02247
Atp13a2	-0.153856	5.19388	-0.482804	0.646219	0.819645	-6.72508
Atp13a3	0.777952	4.30128	3.08484	0.0213188	0.135477	-3.45713
Atp1a1	0.530179	7.53917	3.37888	0.0147059	0.115364	-3.24828
Atp1a3	-0.84254	6.54047	-2.41397	0.0519797	0.206638	-4.55773
Atp1b1	1.06174	4.66273	2.07954	0.0824331	0.264566	-5.06834
Atp1b2	1.49396	1.5671	1.03182	0.341653	0.583896	-5.7756
Atp1b3	-0.116855	7.68582	-0.479749	0.648269	0.820818	-6.7792
Atp23	-0.0605464	2.1248	-0.0610528	0.953285	0.983603	-5.95586
Atp2a1	-0.691628	2.55016	-4.00861	0.00693998	0.0830458	-2.39654
Atp2a2	0.92693	4.76193	4.32671	0.0048596	0.0740939	-1.90025
Atp2a3	-1.44085	7.15571	-4.00541	0.00696541	0.0830458	-2.41721
Atp2b1	0.123836	6.48584	0.500686	0.634294	0.810316	-6.60697
Atp2b2	0.383838	-0.418192	0.408438	0.697025	0.851456	-5.28158
Atp2b4	0.311464	3.14826	0.903826	0.400665	0.633724	-6.36907
Atp2c1	0.284067	6.25705	1.2288	0.26482	0.506525	-6.00965
Atp4a	0.112671	0.927116	0.164312	0.874841	0.943804	-5.96149
Atp5a1	-0.0238529	9.41465	-0.158077	0.879544	0.946011	-6.94214
Atp5b	-0.342293	9.814	-2.26421	0.0638445	0.230735	-4.82218
Atp5c1	0.284402	8.75104	1.78303	0.124477	0.333453	-5.47499
Atp5d	0.0586052	6.27901	0.350305	0.737992	0.873152	-6.78066
Atp5e	0.0410876	7.33628	0.175286	0.866578	0.940871	-6.87612
Atp5g1	0.276099	7.27839	1.46693	0.192397	0.423526	-5.83578
Atp5g3	0.256675	7.37424	1.35571	0.223642	0.461603	-5.969
Atp5h	0.0591406	8.03423	0.248706	0.811822	0.913051	-6.88993
Atp5j	0.0775443	7.64217	0.283427	0.786304	0.898862	-6.86003
Atp5l	-0.145285	8.06139	-0.520712	0.62108	0.801178	-6.76521
Atp5md	0.111267	6.08744	0.358875	0.731889	0.869232	-6.76052
Atp5mpl	0.245062	6.39812	0.763909	0.47367	0.690638	-6.54484
Atp5o	0.160488	7.68833	0.849742	0.427829	0.654435	-6.51789
Atp5pb	0.260503	8.58651	1.38778	0.214189	0.449418	-5.97352
Atp6ap1	-0.21798	8.16888	-1.21507	0.26965	0.511326	-6.16941
Atp6ap2	-0.328236	8.19099	-2.25666	0.0645123	0.231672	-4.809
Atp6v0a1	-1.13494	5.27651	-4.39754	0.00449811	0.0727849	-1.80453
Atp6v0a2	-0.24134	6.7992	-0.795433	0.456446	0.676897	-6.43892
Atp6v0b	0.353862	7.95896	2.05021	0.0858604	0.271079	-5.09139
Atp6v0c	-0.140169	8.76859	-0.918698	0.393429	0.627212	-6.49403
Atp6v0d1	-0.0788631	7.68046	-0.469116	0.655426	0.82567	-6.78686
Atp6v0e	0.148074	8.78028	0.546345	0.60439	0.78992	-6.77311
Atp6v1a	0.444114	7.26792	2.74582	0.0332161	0.165977	-4.09647
Atp6v1b2	0.369054	6.65202	2.41128	0.0521712	0.207	-4.52541
Atp6v1c1	0.284238	7.46843	1.89231	0.106938	0.306805	-5.29383
Atp6v1d	0.229155	7.78025	0.915137	0.395152	0.628507	-6.48488
Atp6v1e1	0.341489	7.03402	1.73007	0.133966	0.34646	-5.49536
Atp6v1f	0.356772	7.73323	1.55152	0.171388	0.398206	-5.7458
Atp6v1g1	0.369034	6.30866	1.47789	0.189544	0.420151	-5.79447
Atp6v1g2	-1.4032	1.16203	-2.86664	0.0283102	0.153431	-3.20695
Atp6v1h	-0.20838	7.07553	-1.17633	0.283694	0.526139	-6.16379
Atp7a	-0.0349468	6.13002	-0.156333	0.88086	0.94677	-6.8216
Atp7b	-1.07127	-0.77956	-1.11656	0.306584	0.550044	-4.90074
Atp8a1	0.0369391	6.36696	0.122454	0.906508	0.960037	-6.83502
Atp8b2	-2.4908	1.28683	-5.19369	0.00198086	0.0557532	-0.956574
Atp8b4	2.9196	4.02815	2.88795	0.0275288	0.151714	-3.21886
Atp9a	0.773602	1.56567	1.97886	0.0948107	0.286381	-4.52941
Atp9b	-0.596925	6.07128	-3.47368	0.0130829	0.109288	-3.00659
Atpaf1	0.530603	5.13737	1.62361	0.155211	0.375576	-5.54025
Atpaf2	0.525406	5.06958	2.96758	0.0248087	0.145002	-3.68581
Atpif1	0.488821	7.97204	2.51276	0.0454366	0.193362	-4.41325
Atpsckmt	0.213371	4.29069	0.911443	0.396947	0.629907	-6.28583
Atr	0.00849135	4.11972	0.0255561	0.980434	0.997998	-6.62412
Atraid	0.336452	6.31006	1.47994	0.189016	0.41958	-5.818
Atrip	-0.381064	4.92048	-1.96679	0.0964159	0.289522	-4.98961
Atrn	1.00638	3.06592	3.55485	0.0118493	0.10467	-2.70076
Atrnl1	-0.117296	2.95502	-0.34829	0.739429	0.874089	-6.45516
Atrx	0.608384	8.08134	1.52113	0.178675	0.406515	-5.80314
Atxn1	0.924754	2.45369	0.783324	0.463009	0.681985	-5.57788
Atxn1l	0.0891454	3.52467	0.333587	0.749957	0.879912	-6.38425
Atxn2	-0.506864	3.21578	-1.46762	0.192214	0.423526	-5.37599
Atxn2l	-0.0271679	4.68995	-0.0430436	0.967053	0.991663	-6.52075
Atxn3	0.247602	4.78287	1.02049	0.346582	0.588177	-6.1305
Atxn7	-0.380928	5.00422	-1.67531	0.144516	0.361684	-5.4489
Atxn7l1	0.562625	5.90206	2.28711	0.0618618	0.227419	-4.68455
Atxn7l2	-1.13738	3.20829	-3.94024	0.00750733	0.0854655	-2.09078
Atxn7l3	-0.571813	3.90325	-1.88123	0.108598	0.309273	-4.86964
Atxn7l3b	0.320788	7.19463	2.00797	0.0910506	0.279503	-5.11762
AU021092	-0.752494	-1.04734	-0.198179	0.849401	0.932748	-5.16405
AU022252	-0.113345	3.30175	-0.377608	0.718623	0.862669	-6.43387
AU040320	-0.435663	6.49683	-1.88464	0.108084	0.30868	-5.27526
Auh	0.264289	5.03553	0.861256	0.421935	0.649707	-6.38669
Aunip	0.443955	2.73689	0.995237	0.35777	0.59808	-5.52535
Aup1	-0.439674	7.9018	-2.95591	0.0251887	0.146049	-3.80456
Aurka	0.807007	4.93733	2.84685	0.0290575	0.155178	-3.64516
Aurkaip1	0.266303	6.48441	1.15465	0.291821	0.533988	-6.16503
Aurkb	-0.0727439	5.47851	-0.167942	0.872106	0.94279	-6.50556
Avil	-2.05012	-1.62271	-1.49233	0.185847	0.415512	-4.46784
Avl9	0.509314	5.03434	2.3611	0.0558811	0.214763	-4.47474
Avpi1	-0.969845	5.84516	-1.97635	0.0951419	0.287091	-4.70201
Avpr2	-1.59185	-2.60815	-0.847268	0.429104	0.65546	-4.92982
AW209491	0.311772	3.97047	1.49715	0.18463	0.414379	-5.5388
AW549877	0.0215092	5.76589	0.0902637	0.930994	0.972997	-6.83744
AW554918	0.512491	3.76221	2.23934	0.0660721	0.234627	-4.53173
Axin1	0.979184	3.82348	4.31431	0.00492617	0.0745594	-1.83
Axin2	-0.943257	-1.64049	-0.37331	0.721657	0.864442	-5.12674
Axl	-1.81707	4.42221	-1.44752	0.197542	0.428992	-5.18061
Azi2	0.379319	6.09392	2.13921	0.0758866	0.253136	-4.89501
Azin1	-0.315565	7.38097	-1.14304	0.296257	0.539522	-6.21235
Azin2	0.767937	-1.90628	0.778266	0.46577	0.683847	-5.11322
B230118H07Rik	0.969405	4.56748	3.39468	0.0144207	0.113925	-3.11777
B230219D22Rik	0.891676	5.00939	3.80749	0.00876266	0.091797	-2.53217
B2m	1.03178	12.2376	3.6078	0.011114	0.102251	-3.04285
B3galnt1	0.0449224	3.20982	0.172568	0.868623	0.941665	-6.82733
B3galnt2	-0.950611	4.81253	-2.63788	0.038373	0.176715	-3.96477
B3galt4	-0.503873	3.94757	-1.82743	0.117033	0.322346	-5.02423
B3galt5	-1.13571	-1.37861	-3.95218	0.0074046	0.0850704	-2.07718
B3galt6	-0.609147	3.60879	-0.936296	0.384996	0.618794	-5.73102
B3gat3	-0.193626	3.98099	-0.803678	0.452015	0.672961	-6.25579
B3glct	0.868818	2.62048	3.16661	0.0192025	0.128545	-3.04408
B3gnt3	-3.47514	0.124292	-3.66629	0.01036	0.0989032	-2.77892
B3gnt4	1.39312	-1.62814	1.85891	0.112021	0.314847	-4.21835
B3gnt5	0.768856	3.27725	0.627067	0.553543	0.753787	-5.77447
B3gnt7	-2.08517	-1.51965	-0.845401	0.430068	0.656124	-4.94288
B3gnt8	-0.825607	4.91714	-4.85399	0.00278102	0.0632147	-1.41922
B3gnt9	-2.50019	-0.266546	-4.94049	0.00254713	0.0609104	-1.13019
B3gntl1	0.212811	3.69829	0.776375	0.466805	0.684894	-6.19235
B430306N03Rik	-1.09848	4.64953	-3.24202	0.0174526	0.124459	-3.29371
B4galnt1	-0.959385	8.30691	-4.94778	0.00252846	0.0606978	-1.33284
B4galnt2	0.90864	-0.559029	0.886023	0.40946	0.639785	-5.12803
B4galnt3	-0.936075	-3.06311	-0.480768	0.647585	0.820455	-5.09238
B4galt3	0.303984	6.08106	1.37525	0.217838	0.453777	-5.90784
B4galt4	0.346664	4.74937	1.03802	0.338982	0.581655	-5.9923
B4galt5	-1.36677	6.11233	-3.43176	0.0137749	0.111739	-3.05056
B4galt6	0.456861	2.8176	0.827997	0.439126	0.663582	-5.62101
B4galt7	-0.907011	3.24772	-3.90643	0.0078069	0.0869762	-2.21749
B4gat1	0.0820726	4.56135	0.437703	0.676806	0.838661	-6.63359
B9d1	1.07549	0.674559	3.0456	0.0224234	0.139149	-3.09399
B9d2	0.592873	5.80097	3.29503	0.0163272	0.121424	-3.28864
Babam1	-0.113958	6.54642	-0.481401	0.64716	0.820136	-6.7269
Babam2	0.510456	6.25056	3.28229	0.0165903	0.121795	-3.30698
Bace1	0.441742	2.91312	1.16455	0.288087	0.530088	-5.75084
Bace2	1.18937	-3.17369	0.46867	0.655728	0.825797	-5.02842
Bach1	-1.0712	4.96063	-3.09384	0.0210738	0.134541	-3.31626
Bach2	0.452566	2.87298	1.47719	0.189726	0.420405	-5.50955
Bad	0.113509	5.33725	0.639756	0.545795	0.748162	-6.58635
Bag1	0.429788	2.68589	0.814254	0.446377	0.6693	-5.90795
Bag2	-0.143163	3.25192	-0.312956	0.764829	0.888564	-6.41571
Bag3	-0.796957	3.41298	-2.68371	0.0360862	0.171974	-3.62701
Bag4	-0.103854	3.15562	-0.153074	0.883321	0.94843	-6.28472
Bag5	0.176706	5.76581	1.15975	0.289891	0.532061	-6.14004
Bag6	-2.20689	6.32268	-7.01247	0.000405591	0.0334538	0.701283
Bahcc1	-1.75836	0.956544	-2.61249	0.0397061	0.178937	-3.43499
Bahd1	0.667355	3.8304	2.92217	0.0263223	0.148764	-3.48652
Baiap2	-0.110957	4.55349	-0.529944	0.615039	0.796957	-6.4864
Baiap2l1	-0.777903	0.913798	-1.32845	0.231973	0.470504	-5.03196
Baiap3	-3.49994	-0.862178	-1.55301	0.171038	0.39752	-4.42828
Bambi	-0.733035	1.41557	-0.667469	0.529112	0.736098	-5.6072
Banf1	0.198501	7.28786	0.930975	0.387531	0.621562	-6.41799
Bank1	2.49099	5.22444	3.40959	0.0141572	0.113088	-2.93195
Banp	-0.562982	4.68761	-1.73177	0.133651	0.346293	-5.22176
Bap1	-1.54332	6.2543	-6.90048	0.00044283	0.0342447	0.579062
Bard1	-0.927028	1.96677	-1.25802	0.254786	0.496558	-4.96173
Barx2	0.439562	-2.38147	0.423944	0.686277	0.845481	-5.06783
Basp1	0.0396874	1.99115	0.0532636	0.959238	0.986853	-5.7723
Batf	0.107699	4.89199	0.465911	0.657592	0.826516	-6.61332
Batf2	-0.621788	-0.869101	-0.48136	0.647187	0.820136	-5.0836
Bax	0.420073	6.99131	1.84783	0.11376	0.317834	-5.31463
Baz1a	0.87948	6.13661	3.83175	0.00851681	0.0905759	-2.57101
Baz1b	0.915388	6.24114	4.20477	0.00556092	0.0773728	-2.13343
Baz2a	0.0253734	6.75656	0.0762916	0.941649	0.977566	-6.87663
Baz2b	0.467193	7.35327	2.13	0.0768609	0.254718	-4.94568
Bbc3	0.0496772	1.65612	0.0806067	0.938357	0.976599	-5.94186
Bbip1	0.0206534	5.70789	0.060997	0.953328	0.983603	-6.82656
Bbs1	-4.22024	-1.59057	-3.85939	0.00824605	0.089345	-2.6411
Bbs10	0.404736	1.96562	0.806065	0.450738	0.671924	-5.82784
Bbs12	-0.611152	2.43157	-1.48022	0.188942	0.419567	-5.00767
Bbs2	-0.150715	3.48499	-0.716689	0.500302	0.711367	-6.29468
Bbs4	0.320236	3.66576	1.72747	0.134449	0.346767	-5.25476
Bbs5	-0.0471681	2.10913	-0.158978	0.878864	0.945936	-6.37811
Bbs7	-0.526233	1.17162	-1.29721	0.241858	0.481659	-5.22526
Bbs9	0.165081	5.70583	0.658594	0.534419	0.739554	-6.45535
Bbx	0.524034	6.49067	2.92492	0.026228	0.148551	-3.81875
BC003965	0.285144	5.07824	1.58766	0.163087	0.386437	-5.56567
BC004004	0.0162561	6.78431	0.0792446	0.939396	0.976943	-6.89042
BC005624	0.205929	6.32943	1.16625	0.287449	0.529621	-6.16377
BC016579	-1.42824	-2.3963	-0.693358	0.513826	0.722699	-5.01174
BC017158	-0.257345	2.50771	-0.32654	0.755024	0.88288	-5.95089
BC024978	-0.989999	0.49013	-1.74147	0.131866	0.344255	-4.44476
BC028528	-0.159857	3.64666	-0.366541	0.726448	0.866758	-6.25864
BC030867	1.00089	2.49876	1.39309	0.212657	0.447868	-5.08811
BC031181	0.517647	7.10863	2.55811	0.0427291	0.186795	-4.35739
BC034090	-0.691285	-0.0628908	-0.992242	0.359116	0.599084	-5.14689
BC048403	0.107342	2.20398	0.389399	0.710327	0.858828	-6.17794
BC049352	0.257241	1.33624	0.521187	0.620769	0.800993	-5.76958
BC049715	0.187087	0.0151489	0.127059	0.903014	0.958545	-5.50433
BC051142	-0.465047	1.49087	-1.19881	0.275471	0.51745	-5.25539
BC052040	-0.232046	4.01263	-0.886706	0.40912	0.639334	-6.15336
BC055324	0.266486	3.6808	0.830917	0.437597	0.662104	-5.92019
BC067074	1.13396	-2.37317	1.89579	0.106422	0.305954	-4.30908
BC147527	0.285493	7.43691	1.93995	0.100082	0.29541	-5.26501
Bcam	2.16858	0.880166	3.15368	0.0195212	0.129355	-2.85675
Bcap29	0.10426	7.0721	0.351495	0.737143	0.872466	-6.81198
Bcap31	0.650352	7.55347	4.29687	0.00502159	0.074895	-2.09389
Bcar1	1.18937	-3.98238	0.796035	0.456121	0.676739	-4.88726
Bcar3	-2.55066	2.05281	-1.69645	0.140351	0.356237	-4.56636
Bcas1	0.974025	2.8281	3.23417	0.0176264	0.124849	-3.04581
Bcas2	0.188432	7.00034	1.29735	0.241813	0.481646	-6.03748
Bcas3	-0.398442	5.46639	-2.28506	0.0620363	0.227656	-4.62309
Bcas3os1	-1.01126	-1.23512	-0.938444	0.383976	0.618017	-5.15118
Bcat1	1.73175	-0.336625	1.38169	0.215955	0.451824	-4.76643
Bcat2	0.0322661	6.81649	0.18616	0.858409	0.936755	-6.8242
Bccip	0.543135	6.6741	3.62417	0.010897	0.101139	-2.89532
Bcdin3d	-0.0464655	3.04208	-0.174151	0.867432	0.941255	-6.58544
Bckdha	0.0358977	5.62127	0.218222	0.834436	0.925011	-6.8165
Bckdhb	0.456466	2.51783	1.02774	0.343421	0.585405	-5.66696
Bcl10	0.0659014	6.61137	0.287456	0.783362	0.897745	-6.81318
Bcl11a	-0.279005	8.48479	-1.15871	0.290285	0.532475	-6.25185
Bcl2	1.28415	3.1471	3.56441	0.0117127	0.104118	-2.6067
Bcl2a1a	-0.37347	6.33648	-0.58023	0.582723	0.773907	-5.97702
Bcl2a1b	0.0533143	6.95731	0.108874	0.916826	0.964708	-6.39123
Bcl2a1c	2.94135	0.264415	2.74823	0.0331098	0.165964	-3.44924
Bcl2a1d	-0.208113	6.87834	-0.38284	0.714937	0.860807	-6.24805
Bcl2l1	0.0729978	5.00194	0.257442	0.805376	0.908771	-6.56663
Bcl2l11	-0.595481	4.68079	-1.35892	0.222677	0.460455	-5.38051
Bcl2l12	-0.0343185	4.59082	-0.160422	0.877774	0.945163	-6.66466
Bcl2l13	-0.534238	5.79355	-1.48117	0.188699	0.419382	-5.69747
Bcl2l14	0.358982	5.29954	0.366349	0.726584	0.866782	-6.47267
Bcl2l15	-0.00601163	-0.857832	-0.00314172	0.997594	0.999575	-5.15275
Bcl2l2	-0.284452	2.33521	-0.908155	0.398548	0.631243	-5.94705
Bcl3	0.467356	2.8473	1.3975	0.211394	0.446031	-5.3919
Bcl6	0.726639	5.26502	3.33172	0.0155948	0.118535	-3.0651
Bcl6b	-1.96283	-1.9561	-1.49615	0.184881	0.41441	-4.46427
Bcl7b	0.101338	6.33321	0.540155	0.608397	0.792903	-6.69215
Bcl7c	0.240234	2.06199	0.298539	0.775287	0.894448	-6.34335
Bcl9	-2.66208	3.28061	-5.13901	0.00208991	0.0566329	-1.06818
Bcl9l	-1.20522	2.87916	-2.8512	0.0288916	0.154785	-3.43532
Bclaf1	0.17058	8.2848	0.922606	0.391544	0.62543	-6.47024
Bclaf3	0.0970877	4.58826	0.34026	0.745172	0.877118	-6.56931
Bco2	0.61367	2.19602	1.42151	0.204639	0.438066	-4.99696
Bcor	-0.565888	5.26138	-2.52896	0.0444493	0.191018	-4.21173
Bcorl1	0.647452	0.993694	1.68851	0.141901	0.358583	-4.72681
Bcr	0.612446	3.18998	2.14297	0.0754917	0.252204	-4.86104
Bcs1l	-0.129039	3.81871	-0.578284	0.583955	0.774881	-6.39091
Bdh1	0.656934	3.61648	1.80282	0.121103	0.328727	-5.04811
Bdkrb1	-1.89079	-2.01802	-1.3404	0.228285	0.467097	-4.58886
Bdkrb2	0.439562	-1.62528	0.357136	0.733125	0.869784	-5.08726
Bdp1	0.0698877	5.51434	0.38496	0.713446	0.859851	-6.6771
Becn1	-0.0491878	7.29713	-0.304884	0.770677	0.89183	-6.83498
Bend3	-0.3119	0.575163	-0.55671	0.597714	0.784831	-5.57601
Bend4	0.624528	4.63991	1.39042	0.213427	0.4486	-5.72029
Bend5	0.191806	-0.663911	0.201404	0.846988	0.931252	-5.43315
Bend6	1.52703	-1.34986	2.7247	0.0341638	0.168071	-3.32709
Best1	1.12994	2.34748	3.57423	0.0115741	0.104016	-2.62629
Bet1	0.328435	5.82563	1.46887	0.191887	0.423344	-5.80554
Bet1l	-0.517026	4.72038	-1.7834	0.124413	0.333432	-5.21425
Bex1	1.40772	0.157203	1.10789	0.310027	0.553393	-5.4263
Bex2	0.524552	1.15971	1.01164	0.350472	0.592	-5.46169
Bex3	0.615086	5.72186	3.20353	0.0183229	0.126439	-3.38467
Bex4	1.50449	2.35956	1.12561	0.303018	0.546682	-5.9155
Bex6	0.642102	5.35127	2.11545	0.0784268	0.257187	-4.69602
Bfar	0.0506767	6.40915	0.289932	0.781555	0.896809	-6.80858
Bglap2	-0.500591	-2.58045	-0.602991	0.568429	0.764928	-5.4571
Bglap3	-0.948876	-1.34961	-1.83981	0.115036	0.320094	-4.61556
Bhlha15	-1.74409	1.21936	-4.18585	0.00567957	0.0775986	-1.9233
Bhlhb9	0.506236	4.71837	1.61414	0.15725	0.378949	-5.50172
Bhlhe40	-0.583647	6.59443	-2.66212	0.037145	0.173768	-4.11797
Bicd1	0.875823	1.95017	3.04954	0.0223099	0.138852	-3.20619
Bicd2	-0.965118	5.21249	-4.40265	0.00447324	0.0725935	-1.72477
Bicdl1	-0.296745	-0.284058	-0.393362	0.707549	0.857139	-5.575
Bicra	-1.14528	3.95504	-1.64177	0.15137	0.370909	-5.1873
Bicral	-0.623653	5.05577	-2.95409	0.0252483	0.14611	-3.69498
Bid	-0.15334	6.71327	-0.668263	0.528639	0.735779	-6.60514
Bik	-2.12381	-1.19254	-1.61941	0.156111	0.377164	-4.36329
Bin1	0.00742586	6.76617	0.0383893	0.970614	0.993426	-6.85339
Bin3	-0.275812	6.96474	-1.65399	0.148838	0.366959	-5.58618
Birc2	-0.123805	6.93181	-0.716663	0.500317	0.711367	-6.56642
Birc3	-0.274165	7.96513	-1.50881	0.181711	0.410487	-5.78694
Birc5	1.36187	5.48962	2.93846	0.0257681	0.147241	-3.56542
Birc6	0.538413	6.46993	1.71268	0.137234	0.351104	-5.48854
Bivm	1.02703	3.61596	3.97171	0.00723999	0.0842132	-2.25813
Blcap	-0.455698	5.65787	-2.50429	0.0459622	0.194415	-4.39635
Blk	0.497054	3.40225	0.593012	0.57467	0.768725	-6.26765
Blm	0.368115	5.10745	0.893798	0.405602	0.637286	-6.2864
Blmh	0.182896	6.9153	1.22015	0.267855	0.509941	-6.12926
Bloc1s1	0.455941	6.21481	2.16217	0.0735113	0.248056	-4.89053
Bloc1s2	0.118588	7.88084	0.642079	0.544384	0.746971	-6.70012
Bloc1s3	-0.644185	1.07675	-0.510069	0.628084	0.80583	-5.43094
Bloc1s4	-0.797492	2.19242	-0.680753	0.521232	0.729478	-5.51817
Bloc1s5	0.115606	4.91637	0.478786	0.648915	0.821217	-6.6646
Bloc1s6	0.285575	6.15607	1.70126	0.139419	0.354576	-5.48365
Blvra	0.347554	5.92387	2.19987	0.0697744	0.242167	-4.79287
Blvrb	0.139066	5.54611	0.510181	0.62801	0.80583	-6.70615
Blzf1	0.181273	4.92147	0.877506	0.413719	0.643588	-6.35261
Bmf	-0.129455	4.40595	-0.30683	0.769266	0.890695	-6.30912
Bmi1	-0.639575	3.55801	-1.51196	0.180931	0.409676	-5.30128
Bmp1	-1.98792	-0.561035	-1.15293	0.292477	0.534757	-4.73235
Bmp2	0.805131	0.0573155	0.702407	0.508552	0.717967	-5.17573
Bmp2k	0.52178	5.9895	2.47457	0.0478567	0.198325	-4.42259
Bmp6	-0.616255	-2.22852	-0.741482	0.486194	0.6999	-5.29259
Bmp7	-1.71888	-2.37487	-0.967386	0.37044	0.608578	-4.85737
Bmp8a	-0.621788	0.156675	-0.47375	0.652302	0.823572	-5.08637
Bmp8b	-0.426483	-1.78576	-0.28899	0.782242	0.897452	-5.1336
Bmper	1.74596	-0.843669	1.75405	0.129585	0.340339	-4.25932
Bmpr2	0.109498	0.612833	0.241758	0.816959	0.915635	-5.81406
Bms1	-0.178625	5.87795	-0.720453	0.498143	0.709811	-6.52906
Bmt2	0.392481	3.86783	1.37512	0.217877	0.453777	-5.67067
Bmx	2.74963	-2.33246	5.29382	0.00179751	0.054813	-1.09838
Bnip1	-0.326947	4.54384	-1.71498	0.136797	0.350348	-5.32351
Bnip2	-0.0827166	7.39818	-0.525061	0.61823	0.799006	-6.71716
Bnip3	-0.10692	4.31067	-0.508016	0.62944	0.806611	-6.56724
Bnip3l	0.228978	7.0939	1.46327	0.193357	0.42481	-5.85477
Bod1	-0.542329	0.0805759	-1.11297	0.308003	0.551526	-5.16366
Bod1l	1.02456	5.35442	3.59296	0.0113148	0.102954	-2.88359
Bok	-0.621788	-1.85038	-0.304667	0.770835	0.89193	-5.1372
Bola1	-0.0295237	4.52955	-0.104073	0.920478	0.966762	-6.73512
Bola3	-0.100556	5.16292	-0.325831	0.755535	0.882922	-6.69843
Bop1	-0.319659	5.89386	-1.52343	0.178114	0.406121	-5.66443
Bora	0.502744	3.69194	1.05094	0.333468	0.57596	-5.76218
Borcs5	-0.0718092	4.85437	-0.351913	0.736845	0.872389	-6.64615
Borcs6	-0.613645	3.43877	-0.61385	0.561685	0.760328	-6.00061
Borcs7	0.39096	4.84194	1.78729	0.123743	0.332855	-5.28423
Borcs8	-0.198881	5.08987	-0.92863	0.388652	0.622878	-6.32266
Bpgm	0.397797	5.08535	2.26307	0.0639446	0.230901	-4.66282
Bphl	0.400984	4.88123	2.2378	0.0662129	0.234925	-4.7001
Bpifa6	-0.564487	-0.800289	-0.352014	0.736773	0.872389	-5.12434
Bpifb4	0.439562	-0.615312	0.396494	0.705357	0.855987	-5.07619
Bpnt1	0.157437	4.73833	0.774282	0.467952	0.68572	-6.40543
Bptf	1.07903	5.72914	3.34277	0.0153814	0.117699	-3.23834
Braf	1.18571	4.79629	3.72996	0.00960291	0.0961004	-2.66973
Brap	0.382844	4.24452	0.642443	0.544163	0.746833	-6.30503
Brat1	-1.89241	5.7414	-8.53083	0.000136497	0.0325152	1.76436
Brca1	0.0795228	3.84538	0.165153	0.874208	0.943296	-6.23222
Brca2	-1.67333	3.12726	-3.00689	0.0235744	0.14195	-3.04153
Brcc3	0.0637128	6.3904	0.247252	0.812896	0.913455	-6.82792
Brd1	1.02334	4.56613	3.58356	0.0114442	0.103598	-2.84755
Brd2	-1.25953	8.07948	-6.25221	0.000753829	0.0398118	-0.0304067
Brd3	0.1451	6.17348	0.547564	0.603602	0.789272	-6.69474
Brd3os	-1.48995	-2.49976	-1.87718	0.109211	0.310021	-4.18291
Brd4	0.931389	5.67974	2.56488	0.0423398	0.186142	-4.28386
Brd7	0.146698	5.74758	0.899444	0.402817	0.635679	-6.38928
Brd8	-0.280716	7.11369	-1.01827	0.347553	0.589193	-6.32317
Brd9	-0.315304	5.8516	-1.73851	0.132409	0.344801	-5.40661
Brdt	1.1281	-1.71311	2.19349	0.0703926	0.243219	-3.96401
Brf1	-0.273026	4.04986	-0.658174	0.53467	0.739738	-6.27828
Brf2	0.0770883	3.54779	0.296552	0.776732	0.894583	-6.45799
Bri3	-0.803416	1.53926	-1.34121	0.228039	0.466807	-5.04221
Bri3bp	-0.0158297	6.80801	-0.0343695	0.973689	0.994933	-6.83015
Brip1	-0.604261	3.84077	-1.01597	0.348561	0.590176	-5.4956
Brix1	0.629168	6.56209	3.29824	0.0162616	0.121295	-3.3138
Brk1	-0.145712	7.65735	-0.686056	0.518108	0.726827	-6.63962
Brms1	-0.0365901	6.28858	-0.221149	0.832257	0.924144	-6.82369
Brms1l	0.676052	4.70242	3.05804	0.0220665	0.138357	-3.51467
Brox	-0.420863	6.34298	-2.34267	0.0573123	0.217657	-4.60388
Brpf1	-0.84033	5.00084	-3.48121	0.0129628	0.108557	-2.8337
Brpf3	-0.956662	1.52226	-2.28844	0.0617485	0.227204	-3.8981
Brsk1	-0.621788	-1.42533	-0.442521	0.673504	0.836639	-5.0973
Brwd1	-0.093675	5.52167	-0.341746	0.744108	0.876745	-6.69577
Brwd3	-0.178561	3.47396	-0.607435	0.565663	0.763404	-6.23929
Bscl2	-0.237451	6.72094	-1.59569	0.161295	0.384082	-5.67029
Bsdc1	-1.31156	5.41578	-6.25865	0.000749702	0.0398118	0.0821773
Bsn	-0.684888	1.60697	-2.57535	0.0417454	0.184641	-3.89887
Bst1	-0.22865	3.64417	-0.412792	0.693998	0.849629	-6.39325
Bst2	0.304994	7.969	1.49181	0.18598	0.415516	-5.89355
Btaf1	0.46631	5.0852	1.26326	0.253024	0.494779	-5.90668
Btbd1	0.155811	3.25005	0.526974	0.616979	0.798253	-6.24309
Btbd10	0.359286	5.08563	2.03502	0.0876907	0.273587	-4.921
Btbd11	-0.00601163	-2.42335	-0.00423806	0.996755	0.999575	-5.15274
Btbd16	1.00326	0.965213	1.2924	0.243413	0.483515	-5.04617
Btbd2	-0.219662	2.26504	-0.64449	0.542922	0.745949	-6.01133
Btbd3	-0.00314228	4.28009	-0.0113939	0.991276	0.999575	-6.71559
Btbd6	-2.82215	2.54145	-4.51445	0.00396568	0.0705785	-1.5821
Btbd7	0.257817	2.47115	0.66568	0.530179	0.737013	-6.01742
Btbd8	0.292679	-0.611297	0.405467	0.699093	0.852471	-5.44516
Btbd9	-0.191211	5.79039	-0.765335	0.47288	0.690055	-6.46367
Btd	0.00915314	4.33297	0.0518081	0.960351	0.987483	-6.79576
Btf3	0.123843	8.32495	0.466112	0.657456	0.826516	-6.80192
Btf3l4	0.488624	6.14618	2.55469	0.0429271	0.187107	-4.31134
Btg1	0.587454	8.66625	2.3654	0.0555529	0.214106	-4.66985
Btg3	0.41861	1.29338	1.38316	0.215528	0.451312	-5.39745
Btk	-0.203593	6.88066	-1.06159	0.328975	0.572249	-6.26806
Btla	0.32671	8.07441	1.33735	0.229221	0.46752	-5.98588
Btn1a1	2.74294	-2.47025	3.29026	0.0164251	0.121558	-2.76524
Btn2a2	-0.770882	-1.83325	-0.5837	0.58053	0.773001	-5.04614
Btnl1	0.99948	-0.686627	0.86217	0.42147	0.649542	-5.0149
Btnl2	1.78818	-0.973559	1.30603	0.239028	0.478365	-4.66867
Btnl6	-0.621788	-2.29735	-0.406914	0.698085	0.851911	-5.10893
Btrc	-0.0486408	5.67456	-0.140026	0.893188	0.954021	-6.84157
Bub1	0.441933	4.37171	0.785849	0.461635	0.680526	-5.96878
Bub1b	-0.322782	5.35482	-0.523457	0.619281	0.799864	-6.30533
Bub3	0.316402	7.82697	1.95707	0.0977279	0.291633	-5.20508
Bud13	0.310555	4.1305	1.60366	0.159535	0.381722	-5.4108
Bud23	0.106826	6.0729	0.596685	0.572368	0.767217	-6.6483
Bud31	0.433728	5.41437	1.77875	0.125218	0.334355	-5.3496
Bysl	-0.174583	5.1539	-0.918109	0.393714	0.627424	-6.25792
Bzw1	0.144133	8.92408	0.598037	0.571522	0.76658	-6.7543
Bzw2	0.412274	6.28263	2.4667	0.0483722	0.199319	-4.42766
C030006K11Rik	-0.0335434	3.76685	-0.0315538	0.975844	0.995741	-6.38281
C030034L19Rik	2.87036	-2.25735	3.84051	0.00842991	0.0899601	-2.23488
C130026I21Rik	0.247224	5.84504	1.12146	0.30465	0.548211	-6.20982
C130050O18Rik	-0.468072	2.78876	-1.17613	0.283769	0.5262	-5.42045
C1d	0.37471	6.93243	1.37091	0.219114	0.455109	-5.94082
C1galt1c1	0.576872	5.62544	2.54405	0.0435497	0.188392	-4.33596
C1qa	1.3953	3.54529	1.28682	0.245228	0.486031	-5.36052
C1qb	0.564781	3.2465	0.384967	0.713441	0.859851	-5.89479
C1qbp	0.434087	6.51399	2.49176	0.0467508	0.195955	-4.37878
C1qc	2.3849	2.37396	0.833606	0.436192	0.661322	-5.32616
C1qtnf1	-1.90187	-1.0358	-1.42907	0.202553	0.435229	-4.68278
C1qtnf12	-0.500073	4.04124	-0.576825	0.584879	0.775785	-6.44564
C1qtnf4	1.02917	-1.10354	0.987957	0.361048	0.600742	-5.05898
C1qtnf6	1.69361	0.754008	1.77322	0.126184	0.335474	-4.31183
C1qtnf7	1.18937	-3.33156	0.443337	0.672946	0.836365	-5.03667
C1ra	4.8121	0.471299	6.43113	0.000648186	0.0391758	-0.2204
C1rl	-0.771107	-1.73902	-0.962911	0.372508	0.610431	-5.01289
C2	-2.64414	-0.807172	-2.32676	0.0585784	0.220509	-3.76597
C2cd2	-1.15996	2.7378	-2.7834	0.0315994	0.161325	-3.33582
C2cd2l	-0.201525	3.0581	-0.606266	0.56639	0.763927	-6.01488
C2cd3	-0.182235	6.25762	-0.657243	0.53523	0.74022	-6.60646
C2cd5	-0.153335	6.13302	-0.58607	0.579035	0.772234	-6.65628
C3	-1.74626	1.84315	-2.24137	0.0658878	0.234375	-3.81271
C330007P06Rik	0.311595	5.4234	1.78064	0.12489	0.333927	-5.36804
C330018D20Rik	0.982651	4.56052	4.48477	0.00409379	0.0715474	-1.71089
C330021F23Rik	-0.242403	8.28751	-0.832897	0.436562	0.661574	-6.53969
C3ar1	-0.733892	0.377112	-1.07933	0.321605	0.56536	-5.1255
C4a	0.439562	-2.74839	0.431874	0.68081	0.841461	-5.06532
C530008M17Rik	0.624501	-0.496402	0.684578	0.518978	0.727636	-5.57219
C5ar1	-0.426483	-1.82287	-0.27709	0.790942	0.902055	-5.13623
C5ar2	1.0293	0.336641	0.936384	0.384954	0.618794	-5.48433
C6	-2.23773	-1.17549	-0.983134	0.363233	0.602685	-4.85691
C77080	0.21738	0.134469	0.372178	0.722458	0.8648	-5.83292
C87436	0.310985	5.3836	1.50649	0.182288	0.411342	-5.71217
C8a	-1.73475	-1.61605	-4.83363	0.00283956	0.063533	-1.16218
C8g	-0.148339	0.53233	-0.189142	0.856172	0.936042	-5.84678
C9orf72	-0.0292876	5.44903	-0.0540181	0.958662	0.986673	-6.49587
Caap1	-0.171872	1.6471	-0.415818	0.691899	0.848407	-5.91386
Cab39	0.905989	5.13752	3.13858	0.019901	0.1311	-3.43694
Cab39l	0.30005	6.34048	1.93641	0.100576	0.296144	-5.17308
Cabcoco1	-0.806801	-1.81287	-1.13981	0.297498	0.541147	-5.13874
Cabin1	-1.13877	6.03105	-4.10317	0.00623252	0.079469	-2.17192
Cables1	0.153766	-1.33369	0.269255	0.796687	0.904637	-5.69201
Cables2	0.249002	2.1946	0.434238	0.679185	0.840247	-6.06544
Cabp4	-3.42961	1.3923	-2.01634	0.0899969	0.277504	-4.02559
Cabyr	1.17832	0.0487227	2.61729	0.0394504	0.178447	-3.49199
Cacfd1	0.104039	4.87846	0.47487	0.651547	0.823123	-6.60054
Cacna1a	-1.07455	0.0118795	-2.28917	0.0616867	0.227044	-3.84227
Cacna1c	-1.2052	-0.616843	-1.02682	0.343822	0.585722	-5.11969
Cacna1d	-0.0329105	2.3722	-0.127781	0.902466	0.958533	-6.76652
Cacna1e	0.249626	5.14594	0.638645	0.546471	0.748427	-6.64539
Cacna1f	-0.00601163	-2.18532	-0.00471853	0.996387	0.999575	-5.15274
Cacna1s	-0.962647	5.21536	-1.37831	0.21694	0.45274	-5.45006
Cacna2d2	-0.314914	-1.17513	-0.38765	0.711555	0.859281	-5.36427
Cacna2d4	0.439844	1.09626	2.47072	0.0481083	0.198888	-4.32222
Cacnb1	-1.8799	1.38903	-2.68549	0.0360007	0.171948	-3.35848
Cacnb2	0.569432	-0.0217174	1.10895	0.309603	0.552955	-5.3386
Cacnb3	0.978726	4.92531	1.86157	0.111609	0.314343	-4.51951
Cacnb4	0.784666	2.18257	2.33796	0.0576841	0.218467	-4.21551
Cacng6	3.35041	-1.2145	5.12929	0.00211	0.0568053	-1.11933
Cacng8	1.32549	-1.11168	1.24012	0.260893	0.50302	-4.7152
Cactin	-0.320695	4.55995	-0.44858	0.669364	0.833499	-6.36675
Cacul1	-0.305105	4.85448	-0.758955	0.476417	0.69291	-6.24621
Cacybp	0.353761	7.1737	1.31882	0.23498	0.474489	-5.99691
Cad	-1.97254	4.5763	-3.90073	0.00785871	0.0870066	-2.16217
Cadm1	-0.0537632	7.40019	-0.166584	0.873129	0.942855	-6.80598
Cadm3	0.845017	4.18646	1.09654	0.314587	0.557842	-5.44706
Cage1	-1.09791	0.290129	-1.88752	0.107653	0.307852	-4.3385
Calcb	1.83702	-2.11469	3.44584	0.0135382	0.110855	-2.5451
Calcoco1	-0.142423	6.46529	-0.653433	0.53752	0.7419	-6.70127
Calcrl	-0.403706	4.52004	-1.48107	0.188724	0.419382	-5.55764
Cald1	1.03115	-1.73193	1.1546	0.291841	0.533988	-4.9353
Calhm6	1.72775	4.49822	2.74119	0.0334214	0.166376	-3.84583
Calm1	0.0321033	10.6012	0.163521	0.875438	0.944213	-6.94964
Calm2	0.60574	8.98745	4.33249	0.0048289	0.0740879	-2.07837
Calm3	-0.514513	8.2003	-2.67369	0.0365738	0.172969	-4.18776
Calm4	3.38307	0.347623	12.5454	1.48235e-05	0.0325152	3.65375
Calml3	-0.146583	-2.37648	-0.28417	0.785762	0.898702	-5.84826
Calr3	0.020103	-1.40143	0.0344939	0.973594	0.994933	-5.58146
Calu	0.0852105	6.75773	0.527522	0.616621	0.798173	-6.70244
Camk1	1.16054	1.61873	1.17833	0.282952	0.525392	-5.12641
Camk1d	0.215881	7.2706	0.978819	0.365197	0.604166	-6.34075
Camk2a	0.138771	2.62177	0.38205	0.715493	0.861298	-6.24902
Camk2b	1.03868	1.10692	1.78065	0.124889	0.333927	-4.59603
Camk2d	0.129848	4.38216	0.326212	0.75526	0.88288	-6.36895
Camk2g	0.599805	4.87125	2.78421	0.0315653	0.161245	-3.92394
Camk4	1.16917	-0.280292	1.39244	0.212844	0.448035	-4.90122
Camkk1	-1.14149	3.7032	-1.78482	0.124168	0.333345	-4.66388
Camkk2	-0.0259753	2.8926	-0.0716925	0.945159	0.979348	-6.27836
Camkmt	0.822916	4.23401	3.74062	0.00948229	0.0951372	-2.5487
Camkv	1.21303	-1.85617	2.3694	0.0552493	0.213281	-3.94112
Caml	0.142009	5.30597	0.757055	0.477473	0.693739	-6.48412
Camsap1	0.653749	2.42647	2.16907	0.0728118	0.247035	-4.37285
Camsap2	0.365209	2.75337	1.22714	0.265398	0.507047	-5.72008
Camsap3	-3.66888	-2.20555	-3.7753	0.00910122	0.0934801	-2.70736
Camta1	0.375547	4.0621	1.28555	0.245642	0.486268	-5.72308
Camta2	-3.06239	6.04325	-5.65955	0.00127405	0.0492591	-0.397858
Cand1	0.270344	6.36614	0.524293	0.618733	0.79949	-6.64439
Cand2	-1.2345	1.64674	-2.87603	0.0279633	0.152727	-3.27644
Cant1	-1.0551	6.15621	-5.21761	0.0019352	0.0557532	-0.984033
Canx	-0.00601835	9.57407	-0.0420935	0.96778	0.991913	-6.96321
Cap1	-1.75146	8.00622	-10.119	5.16025e-05	0.0325152	2.71951
Cap2	1.86078	-1.25538	1.35424	0.224083	0.462282	-4.92036
Capg	0.0596382	6.24393	0.27346	0.793602	0.903365	-6.88339
Capn1	-3.235	2.48376	-5.49552	0.00148372	0.0522433	-0.866013
Capn10	0.500783	2.77544	0.813995	0.446515	0.6693	-5.90603
Capn11	0.503988	-1.86784	0.350289	0.738003	0.873152	-5.35304
Capn15	-2.14534	4.06608	-6.08142	0.000873429	0.0420815	-0.0686128
Capn2	0.109415	6.22031	0.342481	0.743582	0.87652	-6.76383
Capn3	-0.406138	-0.585985	-0.467513	0.656509	0.82602	-5.71426
Capn5	-1.5406	3.68626	-4.48119	0.00410956	0.0715474	-1.75853
Capn7	0.351034	6.29398	1.90562	0.104976	0.30391	-5.21788
Capns1	0.145379	4.46103	0.46234	0.660009	0.827662	-6.51863
Caprin1	-0.257685	8.77682	-1.67062	0.145457	0.362659	-5.60436
Caprin2	0.399466	2.3308	1.17898	0.282712	0.525224	-5.49662
Capsl	2.36245	1.49852	5.85598	0.00106599	0.0451051	-0.403572
Capza1	0.274157	9.11627	1.92003	0.102894	0.300545	-5.28963
Capza2	0.299044	8.81719	1.90022	0.105769	0.304991	-5.30243
Capzb	-0.104508	10.1729	-0.756466	0.477801	0.694053	-6.64945
Car1	0.727263	5.29056	0.486114	0.644003	0.817669	-6.73102
Car11	1.8674	-0.861477	2.58369	0.0412778	0.183029	-3.46296
Car12	1.44781	-1.74753	1.93101	0.101335	0.297532	-4.11205
Car13	0.172741	1.40787	0.123627	0.905618	0.95981	-5.7396
Car15	-0.206103	-1.2708	-0.282089	0.787283	0.899367	-5.50552
Car2	1.84393	7.65142	1.54443	0.173063	0.400201	-5.77552
Car5a	2.24403	-3.15218	3.95163	0.00740933	0.0850704	-2.15725
Car5b	-0.426777	-0.564661	-0.39983	0.703025	0.854313	-5.44919
Car7	0.411963	-1.47714	0.37484	0.720577	0.8639	-5.35354
Car8	2.31309	-2.86819	1.93465	0.100822	0.296658	-4.15479
Car9	0.0954127	3.26092	0.308225	0.768255	0.889939	-6.41422
Card10	0.767937	0.210868	0.988949	0.3606	0.60044	-4.96561
Card11	-0.868005	7.91838	-4.44903	0.0042543	0.0718965	-1.91841
Card14	2.7734	-2.9603	3.14807	0.0196614	0.129935	-2.9384
Card19	0.0978966	5.20754	0.26409	0.800482	0.906081	-6.65155
Card6	-0.236172	4.77077	-1.25037	0.25738	0.499413	-6.05176
Card9	-3.31836	2.74851	-3.01055	0.0234628	0.14195	-3.02367
Carf	1.52439	0.761167	3.22549	0.0178208	0.125043	-2.83155
Carhsp1	-0.192849	5.75466	-1.19018	0.278602	0.521056	-6.10367
Carm1	-0.191052	2.26383	-0.580513	0.582544	0.773907	-6.06551
Carmil1	-0.589164	6.43092	-1.91512	0.103599	0.301751	-5.25308
Carmil2	-0.668881	-0.0309841	-1.0365	0.339635	0.582543	-5.3188
Carmil3	-3.25052	-0.227995	-3.75974	0.00927007	0.0942119	-2.73132
Carnmt1	-0.297347	1.98011	-0.629786	0.551877	0.752592	-5.87505
Carns1	-2.21711	2.42662	-5.15604	0.00205523	0.0562374	-0.900217
Cars	-0.15965	5.62855	-0.619371	0.558275	0.757654	-6.54471
Cars2	-0.0622696	3.82179	-0.121086	0.907547	0.96078	-6.36965
Casc3	0.380312	4.42547	1.53617	0.175032	0.402746	-5.50047
Casc4	0.85177	-0.663234	1.30277	0.24007	0.479639	-4.97723
Casd1	0.389109	3.54075	1.65489	0.148653	0.366881	-5.25805
Cask	0.756505	3.27533	2.67011	0.0367492	0.173025	-3.69928
Caskin2	-5.37772	2.16765	-5.24939	0.00187638	0.0557532	-1.94609
Casp1	0.379772	6.45919	1.48625	0.187395	0.418002	-5.77776
Casp2	-0.215902	6.91254	-1.15011	0.293549	0.535928	-6.18538
Casp3	0.795885	6.49414	1.80438	0.120841	0.328462	-5.36392
Casp4	0.897306	3.59129	2.59086	0.0408803	0.182047	-3.96201
Casp6	-0.273997	6.81668	-1.35067	0.225163	0.463509	-5.93283
Casp7	0.186672	5.28919	0.990185	0.360042	0.599877	-6.1207
Casp8	0.444707	6.92625	2.71784	0.0344778	0.1686	-4.1203
Casp8ap2	-0.216888	6.14606	-0.71321	0.502304	0.712875	-6.53414
Casp9	-1.51735	5.18772	-5.6619	0.0012713	0.0492591	-0.404697
Casr	-1.12178	-1.10872	-0.832707	0.436662	0.661574	-4.92874
Cass4	1.4232	3.97008	3.15683	0.019443	0.12915	-3.22766
Cast	-0.138606	6.57702	-0.891587	0.406696	0.637797	-6.43639
Castor1	2.28299	1.14671	2.33024	0.0582989	0.21979	-3.7322
Casz1	-2.10454	2.18959	-4.95708	0.00250487	0.0606318	-1.09693
Cat	-0.133836	7.73681	-0.788295	0.460307	0.679537	-6.56225
Catip	2.61888	-1.64758	3.10953	0.0206542	0.133184	-2.91632
Catsper2	-0.61484	1.30759	-1.41383	0.206778	0.440324	-4.9617
Catsperd	0.855154	-0.647731	0.734579	0.490095	0.7027	-5.4713
Catsperg1	-2.08517	0.16635	-1.95898	0.0974688	0.291359	-4.07739
Catsperg2	-0.426483	-1.63293	-0.377467	0.718722	0.862669	-5.11077
Cav1	0.439562	-1.75934	0.114944	0.912212	0.962546	-5.13061
Cav2	1.16654	1.43963	3.27856	0.0166681	0.121795	-2.89955
Cavin1	2.33986	0.0764306	2.94852	0.0254322	0.146632	-3.10062
Cavin2	1.60149	0.187527	0.601776	0.569187	0.765018	-5.45691
Cbarp	-1.42105	2.00405	-3.45216	0.0134332	0.110347	-2.54097
Cbfa2t2	0.715939	4.96763	2.87228	0.0281013	0.152966	-3.81977
Cbfa2t3	-0.659122	8.01147	-2.43684	0.0503818	0.203677	-4.50308
Cbfb	0.400296	5.35848	1.92316	0.102447	0.299776	-5.06753
Cbl	-0.0541214	7.21757	-0.182166	0.861407	0.938514	-6.84517
Cblb	-0.124537	6.16245	-0.399688	0.703124	0.854313	-6.71276
Cblc	-2.71174	-1.79659	-2.36411	0.0556515	0.214301	-3.73445
Cbll1	0.286693	5.47542	1.25701	0.255127	0.496765	-5.99989
Cbln3	0.535465	-3.07022	0.59726	0.572008	0.7669	-5.19006
Cbr2	1.18937	-2.80924	0.774165	0.468017	0.68572	-4.8985
Cbr3	0.818725	1.2878	0.699908	0.510005	0.719358	-5.17904
Cbwd1	0.289681	3.75365	1.11831	0.30589	0.549566	-5.89437
Cbx1	-0.0567204	5.89517	-0.365814	0.726963	0.866782	-6.73779
Cbx2	-0.201089	2.64877	-0.5391	0.609081	0.793462	-5.90736
Cbx3	-0.475222	5.99988	-2.78416	0.0315674	0.161245	-3.93315
Cbx4	0.63156	2.91126	2.57276	0.0418915	0.184826	-4.0388
Cbx5	-0.00680749	6.32018	-0.0188699	0.985552	0.999575	-6.81764
Cbx6	-1.54198	4.80985	-6.03322	0.000911009	0.042394	-0.10949
Cbx7	0.152312	3.75868	0.419673	0.689229	0.847268	-6.47637
Cbx8	-0.999447	3.1495	-3.4598	0.0133077	0.110181	-2.67322
Cby1	-0.207801	3.67224	-0.782338	0.463546	0.682209	-6.19718
Cc2d1a	-1.67757	5.54411	-6.34427	0.000697192	0.0395207	0.137678
Cc2d1b	-0.970046	5.86267	-4.89135	0.00267713	0.0623312	-1.29113
Cc2d2a	-0.936075	0.102756	-0.413474	0.693525	0.849521	-5.11562
Cc2d2b	-0.391226	-1.4431	-0.918274	0.393634	0.627378	-5.42212
Ccar1	0.450497	6.80263	2.25151	0.0649721	0.232423	-4.76762
Ccar2	-1.82099	5.67516	-7.78038	0.000228649	0.0331276	1.26568
Ccbe1	1.18937	-3.64853	0.575559	0.585682	0.776509	-4.98913
Ccdc102a	-0.244795	4.17159	-0.23394	0.822752	0.918354	-6.05053
Ccdc106	0.0545024	-0.687973	0.0763867	0.941577	0.977566	-5.64408
Ccdc107	0.449793	6.14166	2.6214	0.039233	0.178033	-4.22209
Ccdc112	1.89448	0.373729	2.76614	0.032331	0.163847	-3.2806
Ccdc114	-1.74765	-0.585501	-2.27051	0.0632922	0.229953	-3.818
Ccdc115	-0.00601095	6.5035	-0.04027	0.969175	0.992741	-6.85313
Ccdc116	-2.48064	-0.723309	-2.10686	0.0793676	0.258946	-3.95125
Ccdc117	0.735973	3.44603	2.32786	0.0584897	0.220375	-4.27148
Ccdc12	0.185422	7.04044	1.06928	0.325764	0.569003	-6.27949
Ccdc120	-1.61177	0.375542	-1.76872	0.126974	0.336468	-4.29492
Ccdc122	0.321836	2.44103	0.442802	0.673312	0.836525	-6.01856
Ccdc124	0.364275	6.73485	1.69101	0.141411	0.357831	-5.52661
Ccdc125	-0.253694	0.82212	-0.532508	0.613368	0.795871	-5.63526
Ccdc126	0.475172	3.09075	2.44712	0.0496804	0.202557	-4.26113
Ccdc130	0.410919	4.78961	2.36133	0.055864	0.214763	-4.51761
Ccdc134	0.700282	5.14142	2.16625	0.0730966	0.247464	-4.81379
Ccdc137	-0.309664	4.48469	-1.40611	0.20895	0.442954	-5.69981
Ccdc138	-1.04952	2.25215	-2.85164	0.0288746	0.154785	-3.28263
Ccdc14	-0.167265	2.78688	-0.585154	0.579612	0.772638	-6.1235
Ccdc146	-1.77537	-1.47716	-0.957021	0.375244	0.611576	-4.86652
Ccdc148	-1.46623	-1.68025	-1.44696	0.197693	0.429221	-4.49904
Ccdc15	0.415747	2.85993	1.36066	0.222158	0.459609	-5.5069
Ccdc150	-0.382583	-0.483196	-0.682583	0.520152	0.728624	-5.57357
Ccdc154	1.81551	-2.75166	1.79487	0.122448	0.33073	-4.3156
Ccdc155	-0.871498	-1.55303	-0.81832	0.444223	0.66803	-4.93102
Ccdc157	-2.97709	1.00311	-4.8603	0.00276315	0.0631356	-1.46588
Ccdc158	-0.25575	-2.10621	-0.213823	0.837714	0.926967	-5.14405
Ccdc162	0.697117	1.23657	3.56859	0.0116535	0.104118	-2.96377
Ccdc163	-0.64739	2.90901	-2.02204	0.0892876	0.276415	-4.50597
Ccdc167	-0.426477	4.60601	-2.30474	0.0603785	0.224359	-4.51026
Ccdc17	-0.0134699	3.44428	-0.0604695	0.953731	0.983937	-6.53611
Ccdc171	0.537654	3.96436	2.09864	0.0802777	0.260609	-4.78353
Ccdc173	0.135751	1.77914	0.357286	0.733019	0.869776	-6.27185
Ccdc174	0.0175663	5.4754	0.0871856	0.93334	0.974133	-6.80032
Ccdc18	-0.254392	2.35747	-0.499389	0.635155	0.811022	-5.92246
Ccdc180	-0.281414	1.60335	-0.603807	0.567921	0.76489	-5.79263
Ccdc181	-0.368564	4.72239	-1.29164	0.243659	0.483772	-5.85304
Ccdc186	0.327735	4.53673	1.44915	0.197105	0.428645	-5.68522
Ccdc189	1.31104	-0.0898203	2.53603	0.0440254	0.189892	-3.56593
Ccdc191	0.514531	4.17179	2.68014	0.036259	0.172352	-3.95045
Ccdc192	1.18937	-0.836463	0.596391	0.572552	0.767315	-4.98066
Ccdc22	-0.406973	4.332	-1.72514	0.134884	0.347321	-5.23373
Ccdc25	0.0638685	5.33757	0.361106	0.730304	0.868505	-6.70938
Ccdc28a	0.257582	3.39179	1.03625	0.339744	0.582543	-6.01979
Ccdc28b	0.314302	5.32692	1.43947	0.199715	0.431608	-5.75403
Ccdc30	1.50204	-2.70007	2.11795	0.0781561	0.256816	-3.95506
Ccdc32	-0.274896	5.11053	-1.62013	0.155956	0.376981	-5.56367
Ccdc34	0.329649	3.78531	1.40558	0.2091	0.44316	-5.46408
Ccdc36	1.91261	1.91222	6.44648	0.000639941	0.0390527	0.222089
Ccdc39	0.560561	-1.39984	0.684192	0.519205	0.72779	-5.42659
Ccdc40	-0.412046	1.36983	-1.38226	0.215788	0.451626	-5.26712
Ccdc43	0.275083	5.4152	1.56438	0.168389	0.39454	-5.6171
Ccdc50	0.59121	6.50531	2.95202	0.0253164	0.146413	-3.75383
Ccdc57	-1.73764	-0.426368	-1.67742	0.144095	0.361142	-4.41177
Ccdc58	0.798241	4.09705	3.44502	0.0135517	0.110855	-2.93698
Ccdc6	0.988447	4.78375	4.21634	0.00548972	0.0768127	-2.04946
Ccdc61	0.00999387	3.99246	0.0184846	0.985847	0.999575	-6.49933
Ccdc62	0.374344	1.84548	0.780227	0.464698	0.683448	-5.91778
Ccdc63	1.85058	-1.392	4.81132	0.00290529	0.063533	-1.18254
Ccdc66	0.505878	4.4723	2.51538	0.0452752	0.193096	-4.22876
Ccdc69	-0.0727881	5.95516	-0.366532	0.726454	0.866758	-6.71566
Ccdc71	-0.170776	5.9137	-1.07524	0.323294	0.566463	-6.20567
Ccdc71l	-0.178602	1.533	-0.340949	0.744678	0.876916	-5.92419
Ccdc73	1.87951	-0.144956	4.00203	0.00699242	0.0830458	-1.97067
Ccdc77	0.112566	3.44196	0.381111	0.716154	0.861441	-6.35504
Ccdc78	-2.17818	-1.60875	-1.69191	0.141235	0.35751	-4.30288
Ccdc80	-0.770882	-1.36594	-0.295537	0.777471	0.895102	-5.14322
Ccdc82	0.472302	5.9323	2.28243	0.0622616	0.228013	-4.70395
Ccdc84	-0.405189	3.16311	-1.49249	0.185808	0.415508	-5.36224
Ccdc85b	0.207403	2.92167	0.150419	0.885327	0.949926	-6.05992
Ccdc86	0.0754087	5.69627	0.388295	0.711103	0.859119	-6.6581
Ccdc88a	0.732728	6.52953	2.22839	0.0670786	0.23701	-4.77387
Ccdc88b	0.120305	4.19432	0.389163	0.710493	0.858861	-6.36413
Ccdc88c	-1.08011	3.82048	-3.46411	0.0132375	0.109674	-2.863
Ccdc9	0.69685	2.22227	2.44765	0.049644	0.202515	-3.95498
Ccdc90b	0.52083	5.01477	2.00957	0.0908484	0.279227	-5.00409
Ccdc91	-0.312002	4.18448	-1.26688	0.251814	0.49392	-5.67903
Ccdc92	2.97979	-1.36376	2.57325	0.0418638	0.184769	-3.48092
Ccdc92b	2.9135	-1.51786	3.04187	0.0225317	0.139333	-2.97826
Ccdc93	-0.488539	4.42071	-1.95076	0.0985893	0.293216	-4.84508
Ccdc96	-1.43045	-1.45576	-1.25164	0.256949	0.49916	-4.65079
Ccdc97	-1.40342	6.63475	-6.38446	0.000674009	0.0392876	0.111906
Ccdc9b	-4.7494	-0.815154	-3.37352	0.0148042	0.115484	-2.93667
Cchcr1	-1.00892	3.43823	-2.91243	0.0266601	0.149651	-3.38708
Cck	3.92535	-3.95699	5.2942	0.00179685	0.054813	-1.71845
Ccl1	1.18937	-2.30989	0.845234	0.430154	0.656175	-4.86113
Ccl12	-0.196917	-2.23456	-0.110285	0.915753	0.964151	-5.15224
Ccl17	-0.0318008	-0.45842	-0.0125963	0.990355	0.999575	-5.15115
Ccl19	0.346035	0.437148	0.152173	0.884002	0.948972	-5.4936
Ccl2	1.18937	-0.665457	0.416182	0.691647	0.848407	-5.04505
Ccl21a	-2.90557	-1.99966	-1.23873	0.261373	0.503197	-4.68192
Ccl22	-3.42229	3.42763	-1.15468	0.29181	0.533988	-4.75274
Ccl24	2.53822	-1.32306	1.46105	0.193943	0.425495	-4.55327
Ccl25	0.320138	1.06932	0.897663	0.403694	0.63614	-5.70847
Ccl27a	0.53134	2.0956	2.1356	0.0762665	0.253949	-4.60563
Ccl3	2.08466	4.9884	3.83595	0.00847507	0.0903644	-2.42585
Ccl4	1.70892	6.85369	2.47689	0.0477058	0.197914	-4.48048
Ccl5	-0.573762	6.71707	-0.667736	0.528953	0.73605	-5.94392
Ccl6	1.00371	5.23322	4.32791	0.00485323	0.0740879	-1.81559
Ccl9	0.801609	2.75643	0.540265	0.608326	0.792893	-5.50924
Ccm2	0.18289	5.69951	0.637317	0.547279	0.748608	-6.5905
Ccna2	1.02771	5.40933	2.59155	0.0408425	0.181968	-3.99505
Ccnb1	0.626377	5.95495	1.33782	0.229077	0.467303	-5.80806
Ccnb2	1.14007	5.75829	2.29654	0.0610634	0.225687	-4.51255
Ccnc	0.717387	5.07745	4.06176	0.00653193	0.0807067	-2.25991
Ccnd1	-0.0203376	10.4671	-0.0855348	0.934599	0.97424	-6.96997
Ccnd2	1.2735	7.22863	1.83297	0.116134	0.321282	-5.34374
Ccnd3	-0.0483469	7.65162	-0.178666	0.864036	0.939756	-6.87265
Ccndbp1	0.307348	6.67125	1.65897	0.147817	0.365882	-5.5701
Ccne1	1.83714	3.46461	5.2234	0.00192433	0.0557532	-0.806021
Ccne2	0.16325	3.30367	0.334594	0.749235	0.87958	-5.9759
Ccnf	1.13142	5.16355	1.83491	0.115821	0.320861	-5.01584
Ccng1	0.074062	7.62028	0.479606	0.648364	0.820853	-6.77724
Ccnh	0.483813	5.85356	2.39134	0.0536135	0.210236	-4.5389
Ccni	0.807097	5.33093	2.52709	0.0445618	0.191156	-4.3299
Ccnj	-0.562139	2.81268	-1.79913	0.121726	0.329567	-4.92577
Ccnk	0.025196	4.9587	0.0647511	0.95046	0.982195	-6.71209
Ccnl1	0.43658	7.03052	1.45405	0.195797	0.426997	-5.82683
Ccnl2	0.453967	5.97068	0.939236	0.383601	0.617744	-6.32514
Ccnq	0.502541	4.65563	2.07678	0.0827503	0.264899	-4.88345
Ccnt1	0.280709	5.69378	1.59054	0.162443	0.385631	-5.58499
Ccny	-0.134148	3.16601	-0.137455	0.895135	0.954836	-6.20817
Ccnyl1	0.553954	1.16781	1.31172	0.23722	0.47679	-5.21499
Ccp110	-0.826402	3.89689	-2.93712	0.0258132	0.147295	-3.42411
Ccpg1	-0.163513	7.50684	-0.91291	0.396233	0.629178	-6.479
Ccr1	0.462828	3.38805	0.961142	0.373328	0.610462	-6.18848
Ccr2	1.07316	7.75737	5.16796	0.00203135	0.0562155	-1.14034
Ccr3	3.46387	1.98896	3.71142	0.00981679	0.0968436	-2.37404
Ccr5	0.159454	6.79231	0.589035	0.577168	0.770904	-6.74965
Ccr6	0.662013	3.95457	2.44917	0.0495418	0.202467	-4.05744
Ccr7	0.658705	7.74591	1.56389	0.168504	0.394585	-5.55694
Ccr9	-0.773276	6.91375	-3.66567	0.0103677	0.0989032	-2.91029
Ccrl2	1.24092	4.80333	2.27335	0.0630452	0.229562	-4.22444
Ccs	-0.205836	4.90348	-0.913266	0.39606	0.629064	-6.36244
Ccsap	0.138082	-0.0708278	0.202632	0.84607	0.930911	-5.60286
Ccser1	-1.46623	1.18421	-0.885203	0.409869	0.64002	-4.90499
Ccser2	0.374084	5.43751	0.811086	0.448061	0.670066	-6.31881
Cct2	0.19563	6.87538	1.31356	0.236639	0.47631	-5.99886
Cct3	-0.106326	7.67275	-0.745035	0.484195	0.698666	-6.59362
Cct5	-0.00306982	9.11731	-0.0218769	0.98325	0.999148	-6.95508
Cct6b	-0.625659	-0.393575	-1.32607	0.232711	0.471558	-4.96432
Cct7	0.247985	8.57854	1.59294	0.161907	0.384799	-5.71503
Cct8	0.135706	8.47607	0.945752	0.380522	0.615407	-6.44342
Ccz1	0.221259	3.93405	1.01126	0.35064	0.592	-5.97897
Cd14	0.412317	3.09834	0.840173	0.432775	0.658554	-6.0943
Cd151	-0.773	4.02917	-3.43067	0.0137935	0.111816	-2.88638
Cd160	3.55399	-0.446385	0.912976	0.396201	0.629178	-5.07384
Cd163	0.871425	3.32818	1.25161	0.25696	0.49916	-5.91277
Cd164	0.0426997	8.93028	0.313653	0.764324	0.888205	-6.91934
Cd177	0.98143	2.28894	1.73899	0.132319	0.344801	-5.14956
Cd19	0.555934	4.10978	0.404677	0.699643	0.852723	-6.347
Cd1d1	0.914043	6.50403	2.30317	0.060509	0.224741	-4.59489
Cd1d2	1.00304	4.22614	1.87492	0.109555	0.310714	-4.82104
Cd2	0.240654	2.41135	0.140269	0.893004	0.954021	-6.05269
Cd200	0.649569	6.35921	2.92555	0.0262063	0.148551	-3.83948
Cd200r1	1.33649	5.47593	4.18691	0.00567285	0.0775986	-2.19068
Cd200r2	2.76546	0.854633	4.60815	0.00358993	0.0678978	-1.35916
Cd200r3	1.65225	2.27813	1.20369	0.273714	0.515025	-5.70113
Cd200r4	1.35216	3.1179	1.90767	0.104678	0.303794	-5.02395
Cd207	-1.36814	0.61683	-0.590444	0.576282	0.770218	-5.06171
Cd209a	0.0325738	8.28465	0.108638	0.917006	0.964815	-6.96295
Cd209b	-0.17622	-0.261283	-0.164421	0.874759	0.943804	-5.14721
Cd209c	-0.791514	2.25487	-1.79373	0.122641	0.331106	-5.18668
Cd209d	-0.513879	3.90047	-1.32437	0.233243	0.472154	-6.05018
Cd209e	0.528108	3.15311	1.07301	0.324214	0.567135	-6.18173
Cd22	0.835722	5.73375	2.05561	0.0852184	0.26967	-4.73209
Cd226	2.34828	-0.125656	3.31328	0.0159583	0.120182	-2.80465
Cd244a	-0.100801	6.68931	-0.379184	0.717512	0.862307	-6.76557
Cd247	-2.98215	0.0938135	-1.0411	0.337658	0.580024	-4.8294
Cd24a	0.542522	6.34085	2.87218	0.0281049	0.152966	-3.84012
Cd27	1.0366	0.934617	1.41378	0.206791	0.440324	-5.24041
Cd274	-0.286938	5.54907	-0.816605	0.445131	0.668355	-6.18762
Cd28	1.50751	1.60345	3.01832	0.023228	0.141108	-3.62111
Cd2ap	0.975489	5.91373	3.77106	0.00914685	0.093742	-2.67508
Cd2bp2	-0.0464902	6.16645	-0.228747	0.826607	0.920706	-6.80201
Cd300a	0.00476127	7.74166	0.018055	0.986176	0.999575	-6.89707
Cd300c2	-0.209057	6.14641	-0.972147	0.368249	0.60687	-6.31901
Cd300e	-3.74092	2.97459	-0.755764	0.478192	0.694296	-5.0263
Cd300lb	1.00522	3.2825	1.09917	0.313525	0.556827	-5.41293
Cd300ld	0.0321057	5.05925	0.0863694	0.933962	0.974149	-6.5418
Cd300ld3	-1.7749	-1.66067	-1.85612	0.112456	0.31534	-4.1641
Cd300ld4	-2.43007	-1.67731	-2.74034	0.0334594	0.166376	-3.44132
Cd300ld5	-2.43007	-1.53253	-2.73813	0.033558	0.166539	-3.44299
Cd300lf	0.085029	7.55286	0.311628	0.76579	0.888744	-6.8687
Cd300lg	0.671881	1.98374	1.07541	0.323221	0.566463	-5.51052
Cd302	-0.780431	2.27759	-0.73262	0.491206	0.703642	-5.25426
Cd320	0.647715	2.7783	2.16702	0.0730188	0.247381	-4.45875
Cd33	-0.393961	3.92761	-1.70307	0.13907	0.354166	-5.45023
Cd34	3.69155	0.788869	2.2919	0.0614546	0.226526	-3.76645
Cd36	3.02514	6.99699	6.22961	0.000768527	0.0401665	0.00911579
Cd37	-0.251271	7.23754	-1.23649	0.262146	0.503715	-6.14628
Cd38	-0.393077	7.12418	-0.894513	0.405248	0.636928	-6.47683
Cd3d	-0.0658482	-0.15348	-0.0391003	0.97007	0.993147	-5.56871
Cd3e	-2.8517	-0.744506	-0.957668	0.374943	0.611429	-4.8865
Cd3eap	-0.408032	4.33107	-1.71978	0.13589	0.349034	-5.17344
Cd3g	2.09176	-0.297915	0.980252	0.364544	0.603649	-5.06865
Cd4	-1.47964	7.91184	-6.64642	0.000542818	0.0372205	0.290421
Cd40	-0.316899	5.58141	-0.643201	0.543703	0.746532	-6.2436
Cd44	0.0301043	8.81162	0.135209	0.896836	0.955987	-6.95229
Cd46	-1.26778	-1.42252	-1.74108	0.131938	0.344297	-4.33729
Cd47	0.495117	9.55117	2.99403	0.0239707	0.142964	-3.8155
Cd48	0.205832	8.09778	0.980895	0.364251	0.60349	-6.41238
Cd5	0.182813	3.83288	0.542795	0.606686	0.791885	-6.26835
Cd52	0.348336	9.83435	1.07474	0.3235	0.566524	-6.34156
Cd55	1.35638	2.56703	2.04012	0.0870724	0.273252	-4.59715
Cd55b	1.38571	-0.281992	1.31333	0.23671	0.476375	-4.94846
Cd59a	1.99233	3.44005	1.81886	0.118433	0.324763	-5.19016
Cd59b	1.24028	-1.20918	1.34161	0.227915	0.466698	-4.93725
Cd5l	-5.13657	1.57243	-1.28975	0.244274	0.484605	-4.66049
Cd6	-4.19438	0.919054	-2.62353	0.0391204	0.178015	-3.50641
Cd63	0.21456	4.11161	0.139459	0.893617	0.954366	-5.80011
Cd68	0.157613	8.45522	0.967341	0.37046	0.608578	-6.45001
Cd69	1.54828	5.85807	2.88642	0.0275844	0.151772	-3.90955
Cd7	0.91032	8.85555	4.0792	0.00640392	0.0801934	-2.39933
Cd70	1.18937	-2.02263	0.82753	0.439372	0.663791	-4.87066
Cd72	0.668607	7.06543	2.85386	0.0287906	0.154532	-3.95157
Cd74	0	15.1085	0	1	1	-7.06505
Cd80	-1.87414	3.04252	-2.16705	0.0730159	0.247381	-3.93742
Cd81	1.13682	7.46374	2.43913	0.0502248	0.203539	-4.374
Cd82	-0.115011	8.46655	-0.726288	0.494808	0.706793	-6.63259
Cd84	2.68973	4.46024	8.21908	0.000168292	0.0325152	1.56329
Cd86	0.00387611	6.51082	0.00899791	0.99311	0.999575	-6.54591
Cd8a	-0.97867	8.20326	-1.28349	0.246317	0.487255	-6.04456
Cd8b1	-1.49625	5.09034	-2.81393	0.0303477	0.158201	-4.01895
Cd9	0.993633	6.23114	2.54898	0.0432603	0.187705	-3.97833
Cd93	1.11191	2.01309	2.02305	0.089162	0.276302	-4.54458
Cd96	0.134094	1.84868	0.158294	0.87938	0.946011	-6.44293
Cd99l2	1.11601	2.55064	2.67468	0.0365251	0.172924	-3.54007
Cdadc1	0.839971	5.21956	4.28829	0.00506923	0.0748978	-2.02664
Cdan1	-0.475203	2.19656	-1.16747	0.286991	0.529406	-5.4668
Cdc123	0.4278	6.73899	2.49614	0.0464734	0.195363	-4.42642
Cdc14a	-0.0771388	5.27157	-0.284003	0.785884	0.898702	-6.56652
Cdc14b	-0.390831	3.82669	-1.73586	0.132895	0.345271	-5.43858
Cdc16	0.703211	5.22818	1.02489	0.34466	0.586157	-6.16
Cdc20	0.747765	5.08683	1.3091	0.238053	0.477696	-5.69313
Cdc23	0.123316	6.0888	0.546221	0.60447	0.789941	-6.68257
Cdc25a	0.474083	3.71461	2.01751	0.0898505	0.277218	-4.74396
Cdc25b	0.357055	4.41283	0.417361	0.69083	0.848144	-6.50272
Cdc25c	-1.33339	2.03847	-1.93757	0.100413	0.295876	-4.22924
Cdc27	0.609996	5.28176	2.78416	0.0315673	0.161245	-3.93162
Cdc34	-0.861745	4.40237	-1.91458	0.103677	0.30191	-4.78174
Cdc37	0.00967513	8.01273	0.0690426	0.947183	0.980416	-6.91138
Cdc37l1	0.112797	4.61464	0.511937	0.626852	0.804879	-6.49944
Cdc40	0.154377	6.26271	0.996611	0.357153	0.597551	-6.31866
Cdc42	-0.125416	10.2944	-0.857078	0.424067	0.651058	-6.56523
Cdc42bpa	2.58495	-0.339906	3.24176	0.0174583	0.124459	-2.76231
Cdc42bpb	-0.345308	3.56641	-1.2171	0.26893	0.510898	-5.69133
Cdc42bpg	-2.58936	2.0309	-5.06054	0.0022585	0.0582123	-1.06546
Cdc42ep1	0.439562	-3.23691	0.265349	0.799556	0.905513	-5.10878
Cdc42ep3	0.328126	6.02162	1.55121	0.171462	0.398206	-5.54139
Cdc42ep4	-3.97854	2.73808	-2.58537	0.041184	0.182809	-3.46206
Cdc42ep5	-0.133668	-2.04519	-0.0741819	0.943259	0.978174	-5.37542
Cdc42se1	-0.531242	8.40679	-3.3124	0.015976	0.120182	-3.33531
Cdc42se2	-0.186177	8.92919	-1.16549	0.287734	0.52991	-6.23724
Cdc45	0.656309	4.35282	1.65712	0.148195	0.366365	-5.12062
Cdc5l	0.545374	7.09056	3.52267	0.0123223	0.106425	-3.028
Cdc6	1.42533	5.25041	2.63641	0.0384491	0.176869	-4.00723
Cdc7	-0.344458	5.14553	-1.04377	0.336517	0.578989	-6.08726
Cdc73	0.459967	2.69631	1.68644	0.142308	0.358835	-5.01025
Cdca2	1.28442	4.54464	3.44458	0.0135592	0.110855	-2.76007
Cdca3	1.02714	4.62786	3.32978	0.0156327	0.118665	-2.93067
Cdca4	-0.310662	6.00251	-1.62932	0.153992	0.374508	-5.51073
Cdca5	0.512181	4.4572	1.32847	0.231964	0.470504	-5.53387
Cdca7	0.438535	4.58758	0.764123	0.473551	0.690546	-6.0613
Cdca7l	-0.111497	5.83673	-0.649838	0.539687	0.743485	-6.54271
Cdca8	0.789244	5.54549	1.62684	0.154521	0.375033	-5.3571
Cdcp1	-0.621788	1.33124	-0.532217	0.613557	0.796034	-5.06411
Cdh1	-0.476372	3.87141	-1.10408	0.311553	0.555318	-6.26307
Cdh11	-0.161583	-0.0854108	-0.22783	0.827288	0.921097	-5.68398
Cdh17	3.41493	3.066	2.80234	0.0308162	0.159298	-3.29601
Cdh2	-0.25575	-1.58611	-0.216733	0.835544	0.925546	-5.14356
Cdh22	-1.86873	-0.20903	-1.60091	0.160141	0.382288	-4.80818
Cdh23	0.803068	1.73446	1.97525	0.0952881	0.287462	-4.36375
Cdh3	1.60792	-2.09732	3.04919	0.0223197	0.138852	-2.96934
Cdh4	-0.00601163	-3.07809	-0.00400424	0.996934	0.999575	-5.15274
Cdh5	-1.48395	3.53936	-7.18236	0.000355755	0.0331559	0.77489
Cdh6	1.18937	-3.97629	0.626716	0.553758	0.753898	-4.96788
Cdhr1	-1.99538	0.608322	-1.78375	0.124352	0.333432	-4.2848
Cdhr3	-0.909539	0.996503	-0.580189	0.582749	0.773907	-5.05403
Cdhr5	-0.0713044	-0.6127	-0.245201	0.814412	0.914307	-6.24409
Cdip1	-0.442347	6.69477	-2.18408	0.0713151	0.244568	-4.89637
Cdipt	0.353504	7.04779	2.37633	0.0547272	0.211991	-4.60834
Cdiptos	-0.300449	0.460665	-0.610341	0.563859	0.762268	-5.57132
Cdk1	0.772612	5.23511	1.82204	0.117912	0.323475	-5.04216
Cdk10	-0.230098	4.41927	-1.17083	0.285738	0.528089	-5.90432
Cdk11b	-0.285546	6.56479	-1.56236	0.168858	0.394987	-5.67622
Cdk12	0.636046	5.45607	2.26124	0.0641059	0.231081	-4.68194
Cdk13	0.152558	4.71824	0.638446	0.546591	0.748427	-6.45663
Cdk14	-2.25925	4.69419	-3.53011	0.0122111	0.105942	-2.4543
Cdk16	0.725932	3.22777	1.6603	0.147545	0.365442	-5.17784
Cdk17	1.18597	3.91864	4.16071	0.00584166	0.0786231	-2.04133
Cdk19	-0.207067	5.10483	-1.139	0.297814	0.541516	-6.02453
Cdk2	0.589683	6.534	1.65276	0.14909	0.367353	-5.52876
Cdk2ap1	-0.86294	2.78473	-2.33688	0.0577695	0.218591	-4.00942
Cdk2ap2	-0.170066	7.72324	-0.765861	0.47259	0.690052	-6.58506
Cdk4	-0.219545	7.35991	-1.44102	0.199293	0.431	-5.85103
Cdk5	-0.135112	5.0947	-0.752937	0.479769	0.695308	-6.45435
[truncated: 10,412 more rows]
