# Supplementary material for: Epigenetic Activation of Plasmacytoid DCs Drives IFNAR-Dependent Therapeutic Differentiation of AML
Source: Oxford University Press journal article supplement (doi:10.1158/2159-8290.cd-20-1145), 2022-03-21
Supplement: cd-20-1145_table_s9_suppst9.xlsx [file cd-20-1145_table_s9_suppst9.xlsx]

## Sheet: Coltron_TFs_cDC
	Vehicle		Panobinostat
1	ETV3	1	YY1
2	SUGT1	2	JUN
3	IRF5	3	FOSB
4	ETV6	4	JUNB
5	BHLHE40	5	REL
6	ARID1B	6	KLF13
7	RBPJ	7	BHLHE40
8	JUNB	8	EGR3
9	MNT	9	RBPJ
10	0610040F04RIK	10	MNT
11	EGR3	11	KLF6
12	SREBF2	12	KLF3
13	KLF6	13	FOS
14	TGIF1	14	0610040F04RIK
15	REL	15	PAPOLG
16	MEF2D	16	FOXN2
17	BATF3	17	ETV3
18	FOS	18	IRF5
19	HIVEP1	19	ETV6
20	FOXN2	20	ARID1B
		21	1700016G22RIK
		22	MEF2D
		23	BCL6
		24	HIVEP1
		25	TGIF1

## Sheet: Coltron_TFs_pDC
	Vehicle		Panobinostat
1	CIC	1	CIC
2	NFATC1	2	NFATC1
3	FOXP1	3	FOXP1
4	HDAC5	4	HDAC5
5	TCF4	5	TCF4
6	JUNB	6	JUNB
7	JUND	7	CDC5L
8	IKZF1	8	KIF11
9	ETS1	9	REL
10	RARA	10	YY1
11	SUGT1	11	IKZF1
12	UBTF	12	ETS1
13	MNT	13	RARA
14	KLF6	14	STAT3
15	USF1	15	UBTF
16	KLF2	16	MNT
17	1700011J10RIK	17	PARD6B
18	KLF13	18	KLF6
19	CDC5L	19	USF1
20	DDIT3	20	KLF2
21	ZBTB7A	21	NFKB1
22	TSC22D3	22	KLF13
23	FLI1	23	NR3C1
24	SPIB	24	DDIT3
25	MYNN	25	ZBTB7A
26	RPS6KA1	26	FOS
27	IRF1	27	TSC22D1
28	PRDM15	28	SP1
29	IRF5	29	TSC22D3
30	ZNRF3	30	SP3
31	ETV6	31	FLI1
32	ARID1B	32	JUND
33	ARID1A	33	SPIB
34	IRF8	34	MYNN
35	RFX1	35	ZEB2
36	RUNX1	36	ZBTB1
37	MEF2D	37	RPS6KA1
38	HIVEP1	38	IRF1
39	HIVEP3	39	PRDM15
		40	ZNRF3
		41	IRF5
		42	ETV6
		43	ARID1B
		44	ARID1A
		45	IRF8
		46	RUNX3
		47	MEF2A
		48	RUNX1
		49	MEF2D
		50	ATF6B
		51	HIVEP3
		52	HIVEP1
		53	ZBTB25
