# Supplementary material for: Epigenetic Activation of Plasmacytoid DCs Drives IFNAR-Dependent Therapeutic Differentiation of AML
Source: Oxford University Press journal article supplement (doi:10.1158/2159-8290.cd-20-1145), 2022-03-21
Supplement: cd-20-1145_table_s10_suppst10.xlsx [file cd-20-1145_table_s10_suppst10.xlsx]

## Sheet: qPCR primers
	Primer sequence (5'>3') FWD	Primer sequence (5'>3') REV
mIFNb	TCAGAATGAGTGGTGGTTGC	GACCTTTCAAATGCAGTAGATTCA
mIfna4	CCTGTGTGATGCAGGAACC	TCACCTCCCAGGCACAGA
mActinb	CAGAAGGAGATTACTGCTCTGGCT	GGAGCCACCGATCCACACA
mIrf7	TGCAGTACAGCCACATACTGG	CTCGTAAACACGGTCTTGCTC
mOas2	CTGTGGCTGAAAATCCATGA	CTGTGAGAACTCCCCTGGTG
mStat1	CGCGCATGCAACTGGCATATAACT	AAGCTCGAACCACTGTGACATCCT
mHprt	CTCTCGAAGTGTTGGATACAG	GACACAAACGTGATTCAAATCC
mIrf9	CAAGACCATGTTCCGGATTC	ACTCTTGTTGAGGGCACAGC
AML1-ETO	CTACCGCAGCCATGAAGAACC	AGAGGAAGGCCCATTGCTGAA
